# Supplementary material for: Positional specificity of different transcription factor classes within enhancers
Source: PubMed Central journal article supplement — Proc Natl Acad Sci U S A. 2018 Jul 9;115(30):E7222–30. doi: 10.1073/pnas.1804663115 (PMC6065035; doi:10.1073/pnas.1804663115), 2018-07-09
Supplement: pnas.1804663115.sapp.pdf [file pnas.1804663115.sapp.pdf]

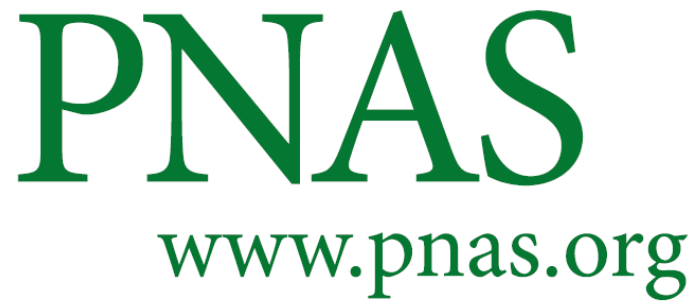

## Supplementary Information for

Positional specificity of different transcription factor classes within enhancers

Sharon R. Grossman, Jesse Engreitz, John P. Ray, Tung H. Nguyen, Nir Hacohen, Eric S. Lander

Eric S. Lander

Email: [lander@broadinstitute.org](mailto:lander@broadinstitute.org)

### **This PDF file includes:**

Figs. S1 to S13

Tables S1 to S3

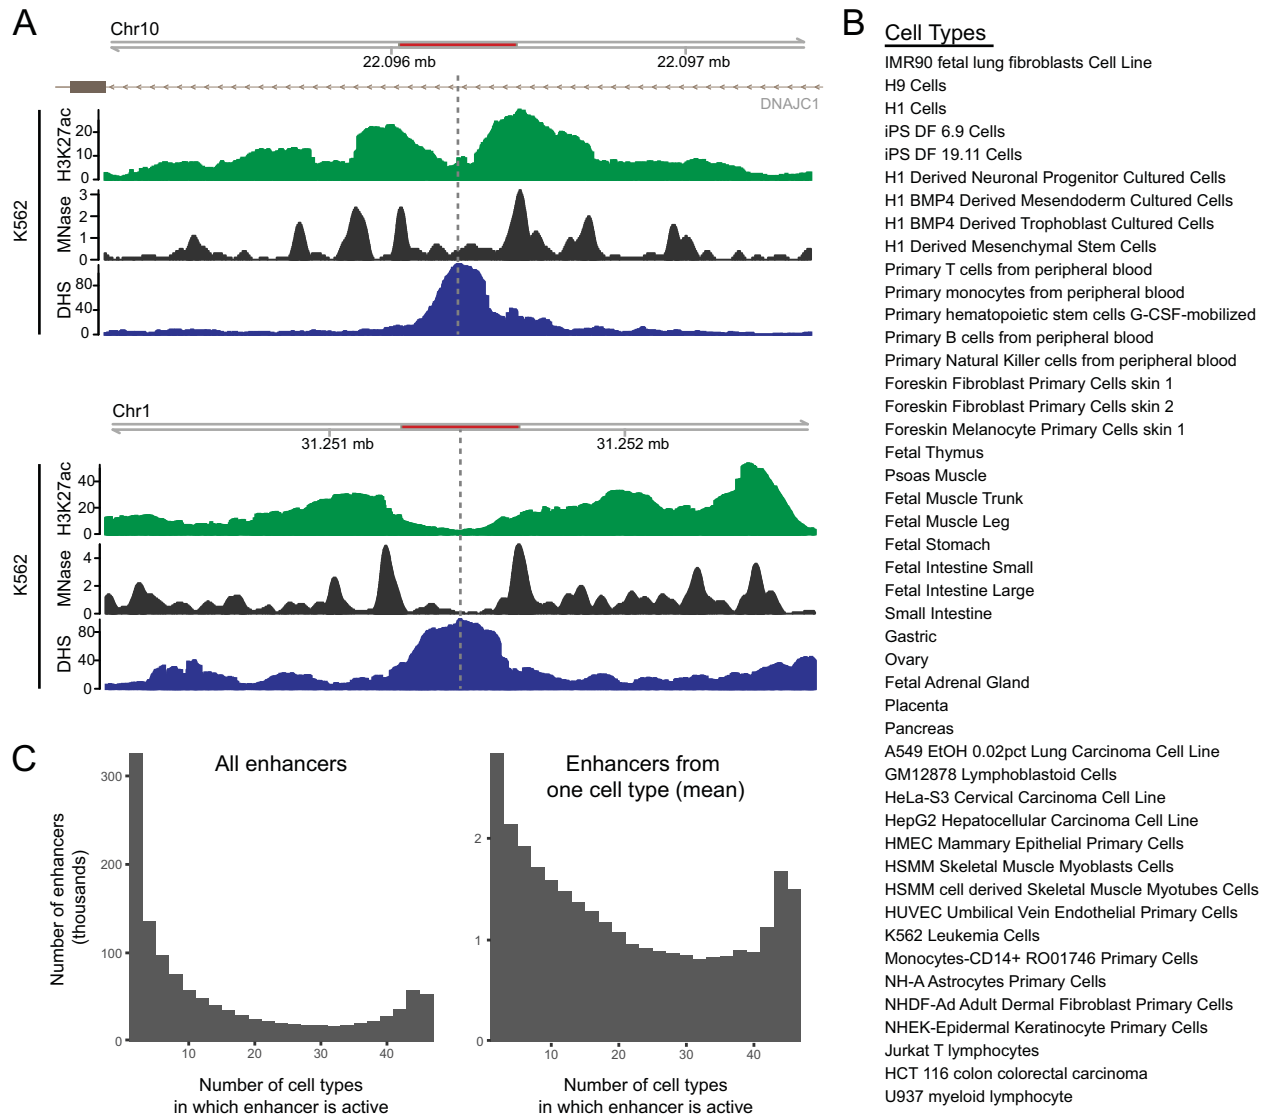

**Figure S1. Selection of nucleosome-depleted regions used in analysis.** (A) Chromatin structure around two example putative regulatory regions from K562 cells. DNaseI hypersensitive regions (DHS) (blue track) surrounded by regions marked with H3K27ac (green track) centered around the peak of the signal (dotted line) were selected. Micrococcal nuclease accessibility data (MNase-seq, black track) shows these NDRs are flanked by well-positioned nucleosomes. (B) List of 47 cell types in which 577,669 putative regulatory NDRs were identified. (C) Distribution of number of cell types with activity (defined by significant DHS/ATAC-seq and H3K27ac signal) for all NDRs (left) and average distribution (right) for NDRs active in a cell type (averaged across all cell types).

## Clustering by enhancer activity across all cell types

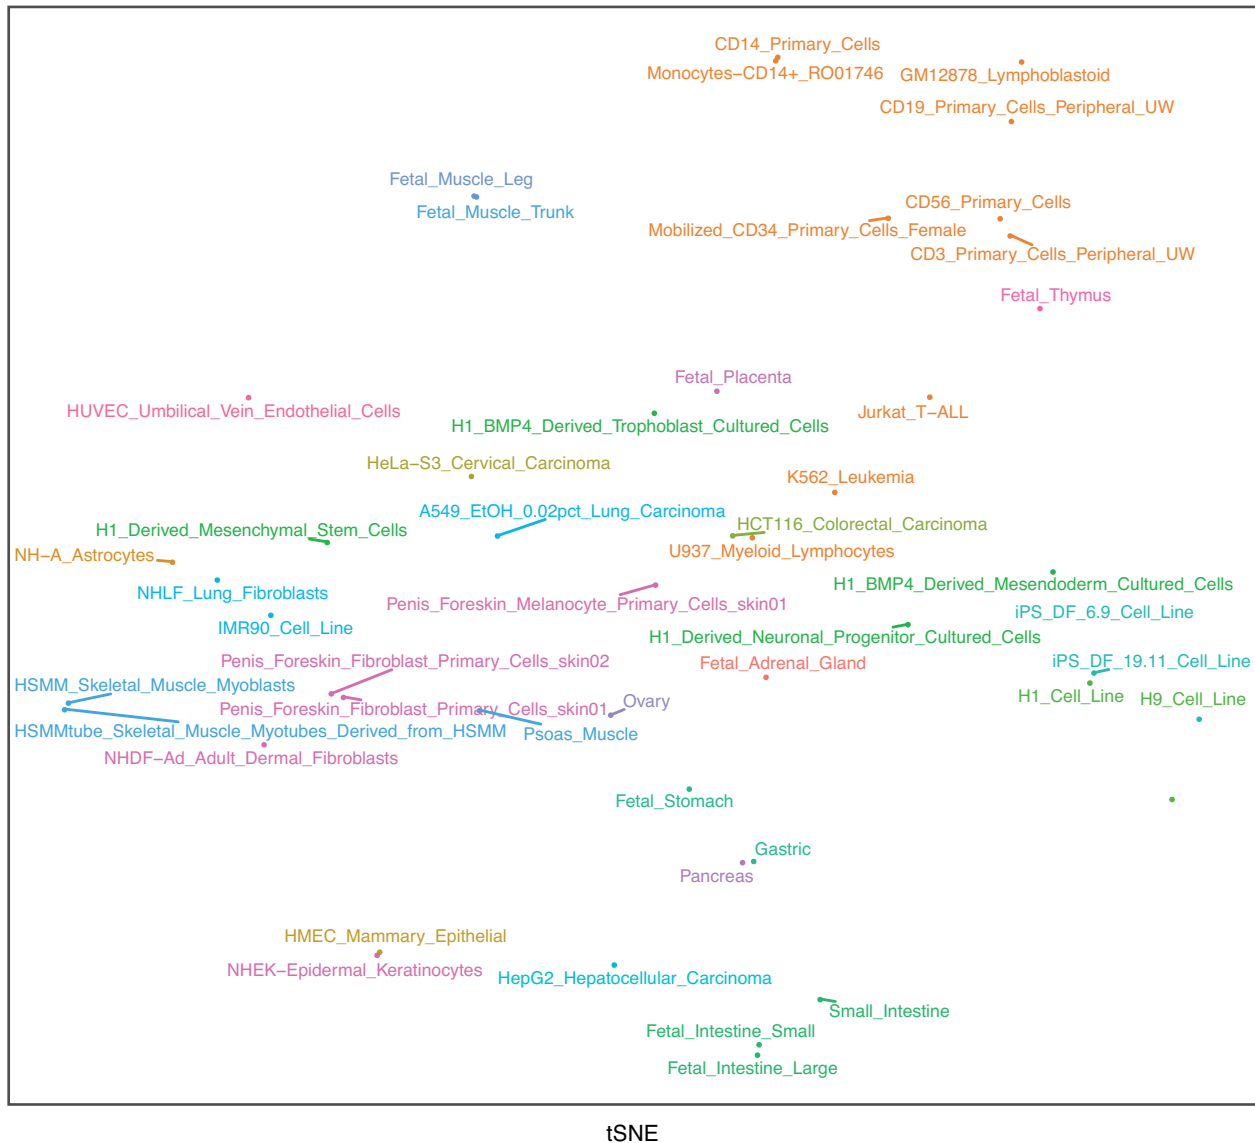

**Fig. S2. Cell types clustered by activity of putative regulatory elements.** t-SNE plot of 47 cell types clustered based on the activity of the 577,669 putative regulatory elements. Regions were defined as active in a given cell type if they overlapped significant DHS/ATAC-seq and H3K27ac ChIP-seq peaks. Each point represents one cell type. Cell type are colored based on their anatomical origin.

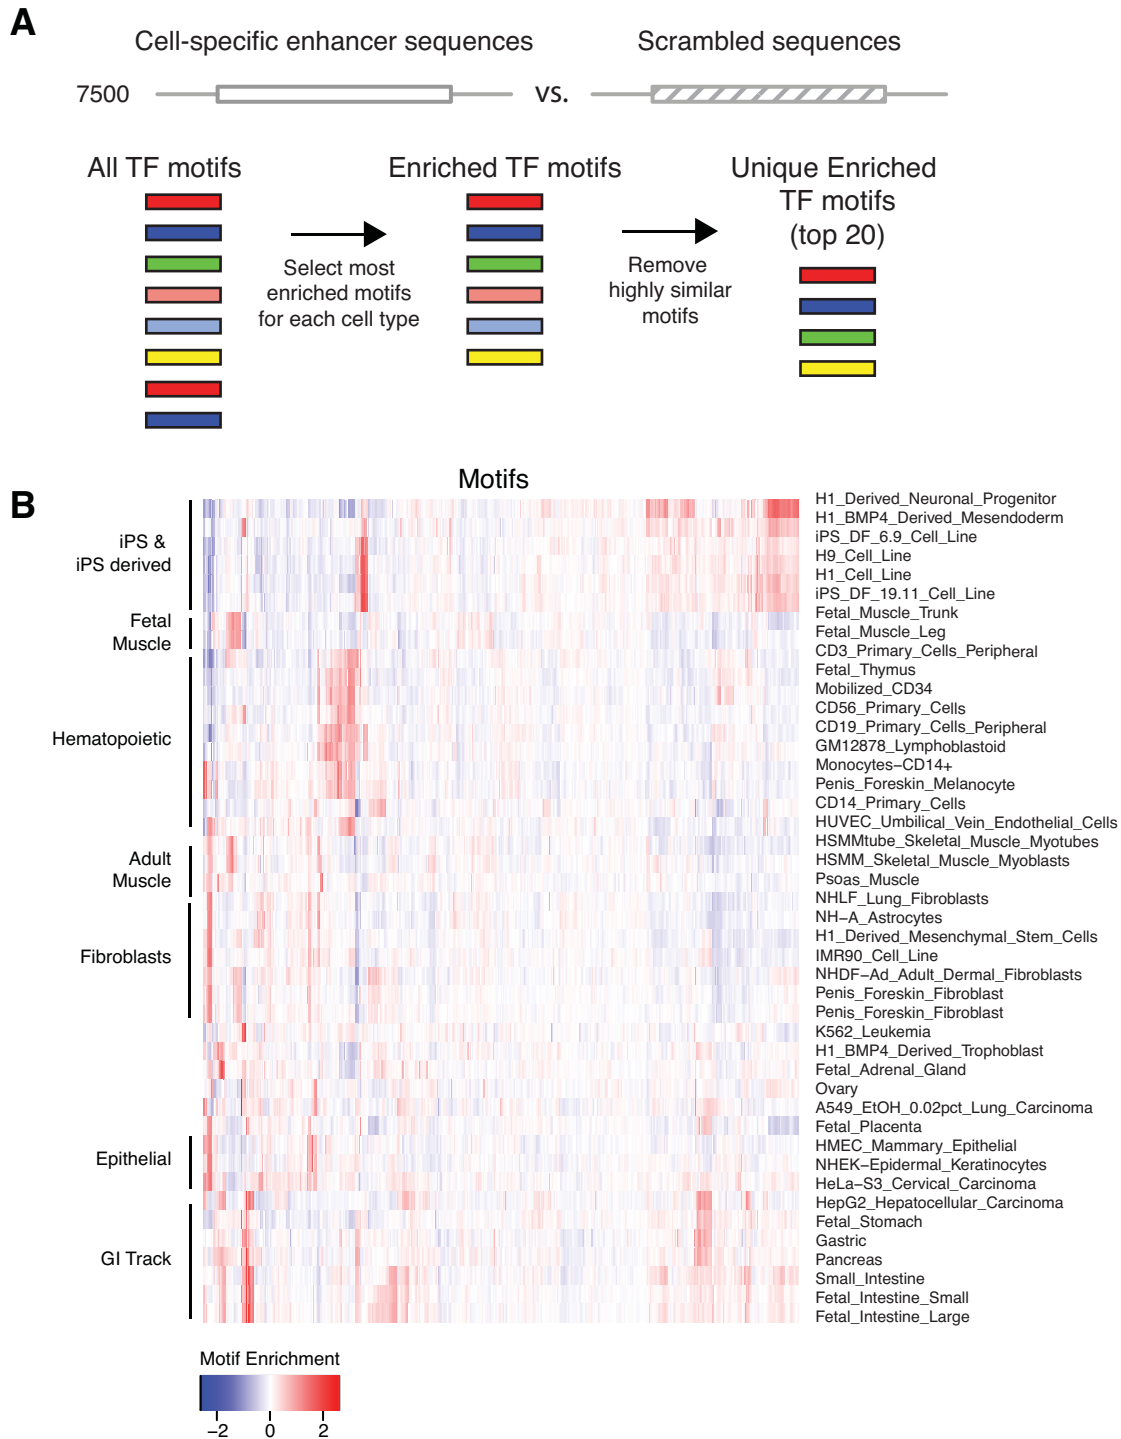

**Fig. S3. Identification of enriched TF motifs in each cell type.** (A) TF motifs from JASPAR, TRANSFAC, and CIS-BP enriched in genomic sequences of NDRs relative to shuffled sequences were identified for each cell type. For TFs with multiple motifs in the combined database, the most enriched motif corresponding to each TF in each cell type was selected, and motifs with high similarity to a more highly enriched motif were removed (see Methods). The 20 most enriched TF motifs from the filtered list were used for positional analysis. (B) Enrichment of TF motifs across cell types. Related cell types generally show correlated motif enrichment profiles.



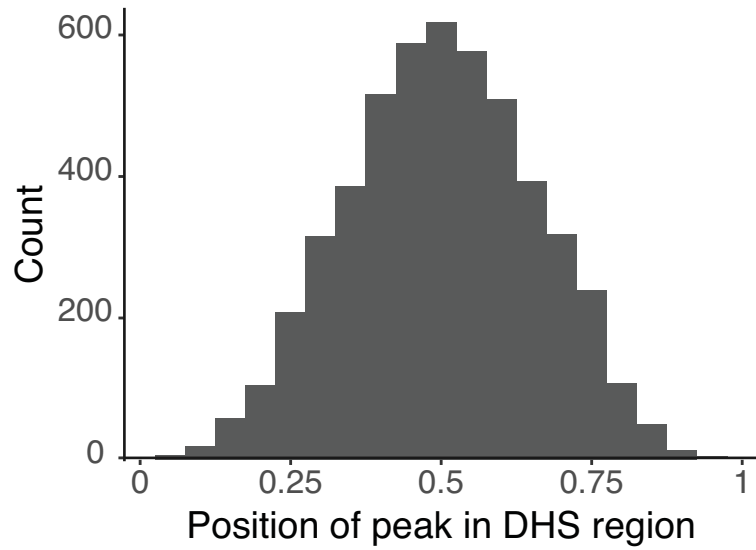

**Fig. S4. Position of peak of DHS signal within full DHS region.** Distribution of the relative position of the peak of the DHS signal within the overall DHS region (as defined by the MACS2 peakcaller). The peak of the signal falls within the central third of the region in 72% of NDRs.

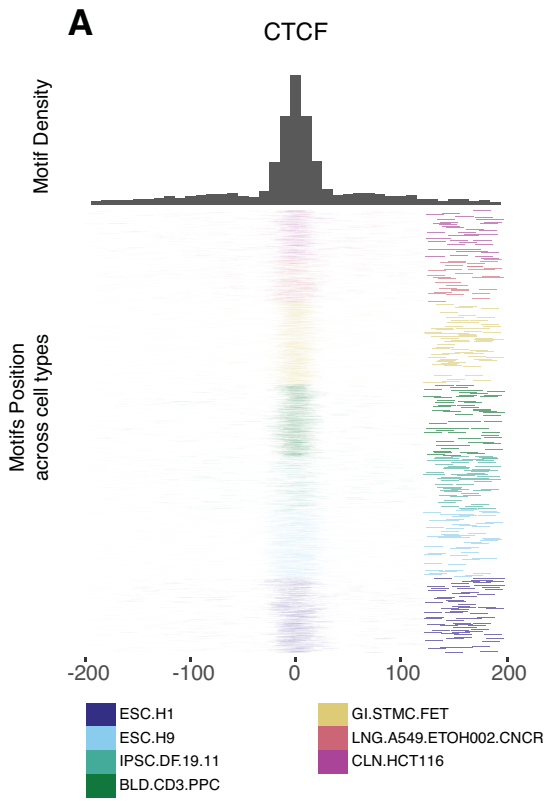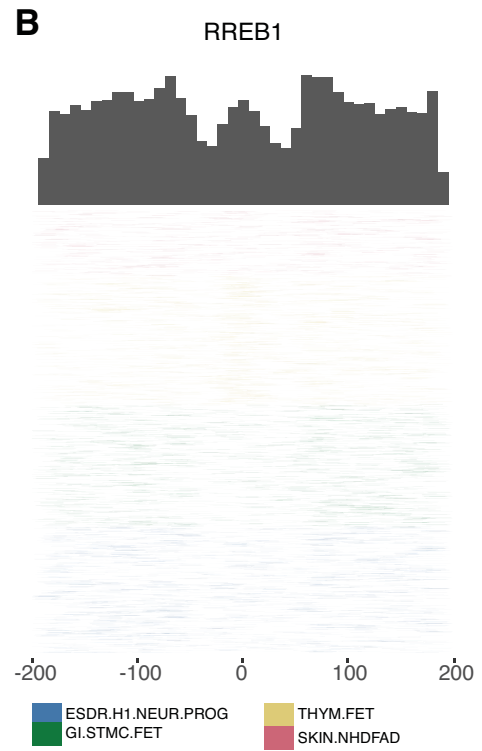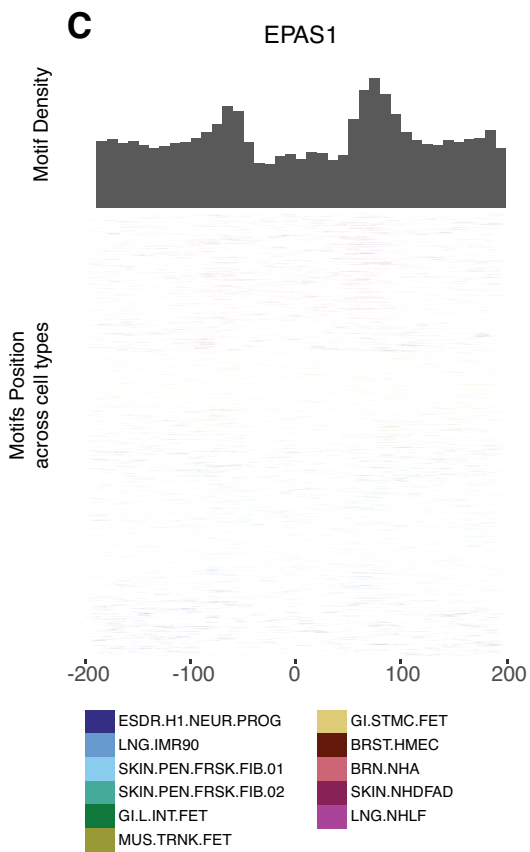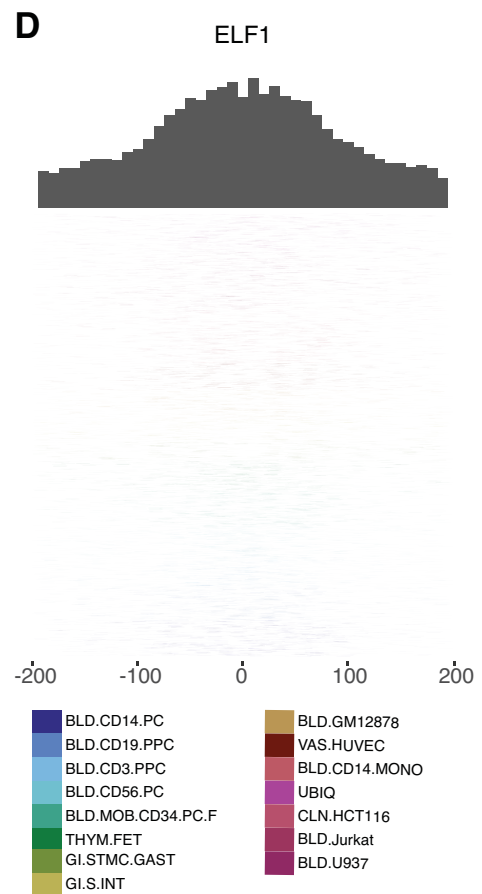

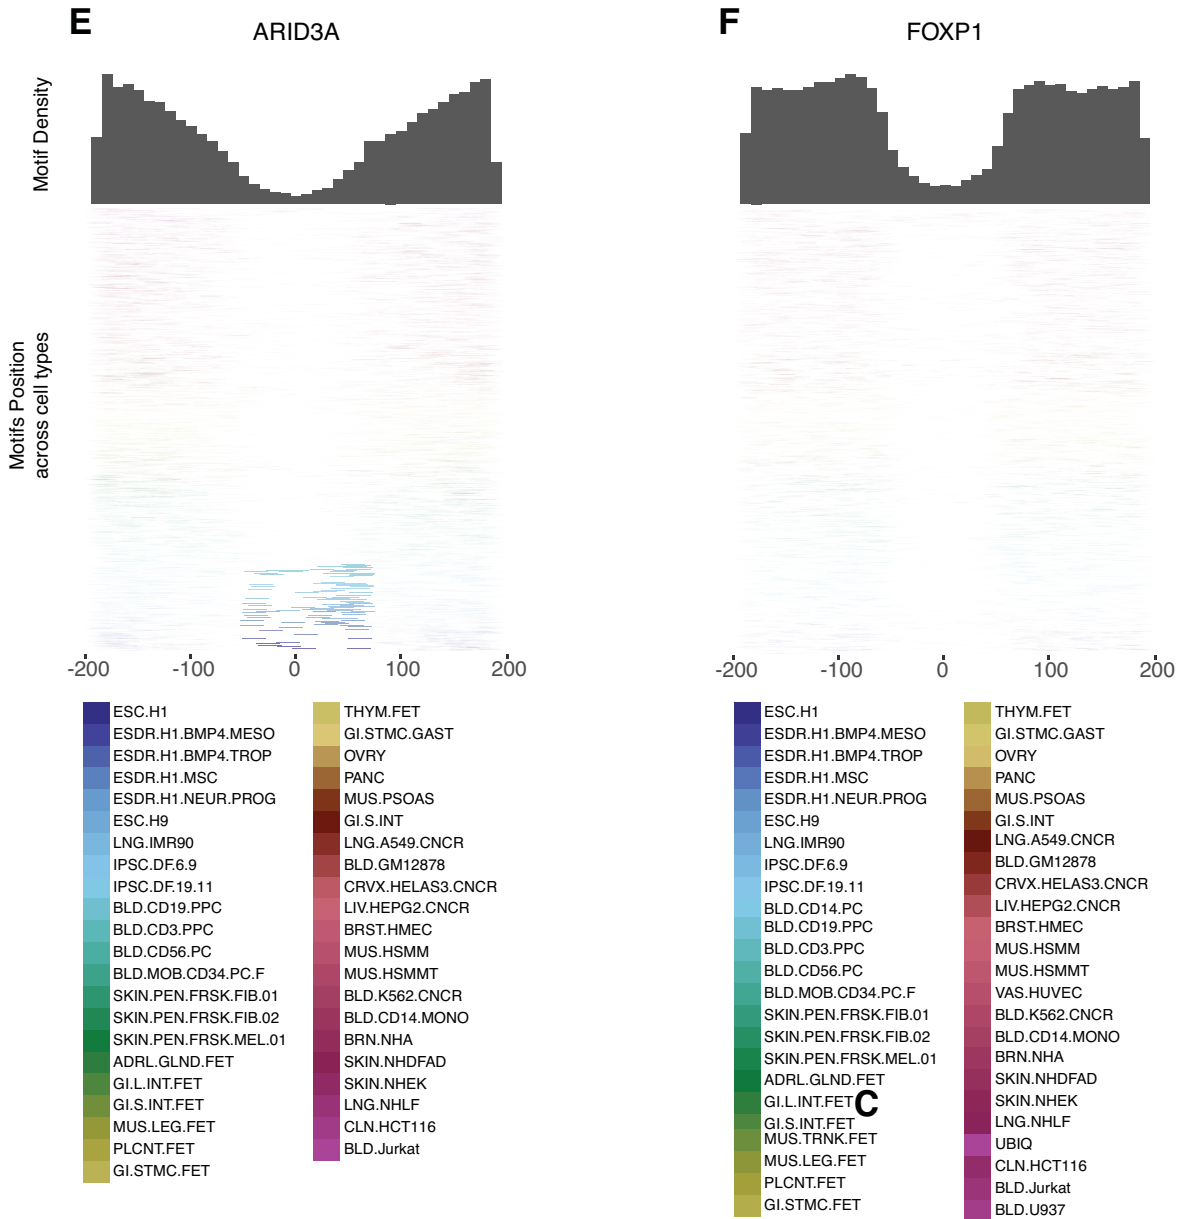

**Fig. S5. Positional binding patterns of TF motifs show striking differences.** Distribution of position of motif sites for CTCF (A), RREB1 (B), EPAS1 (C), ELF1 (D), ARID3A (E) and FOXP1 (F) across NDR regions, centered around the peak of the DHS signal. Histograms show density of motif sites in 10 bp bins tiled across the NDR (top). Heatmaps show the position of 10,000 motif sites in NDRs. Colors indicate motif sites in different cell types.

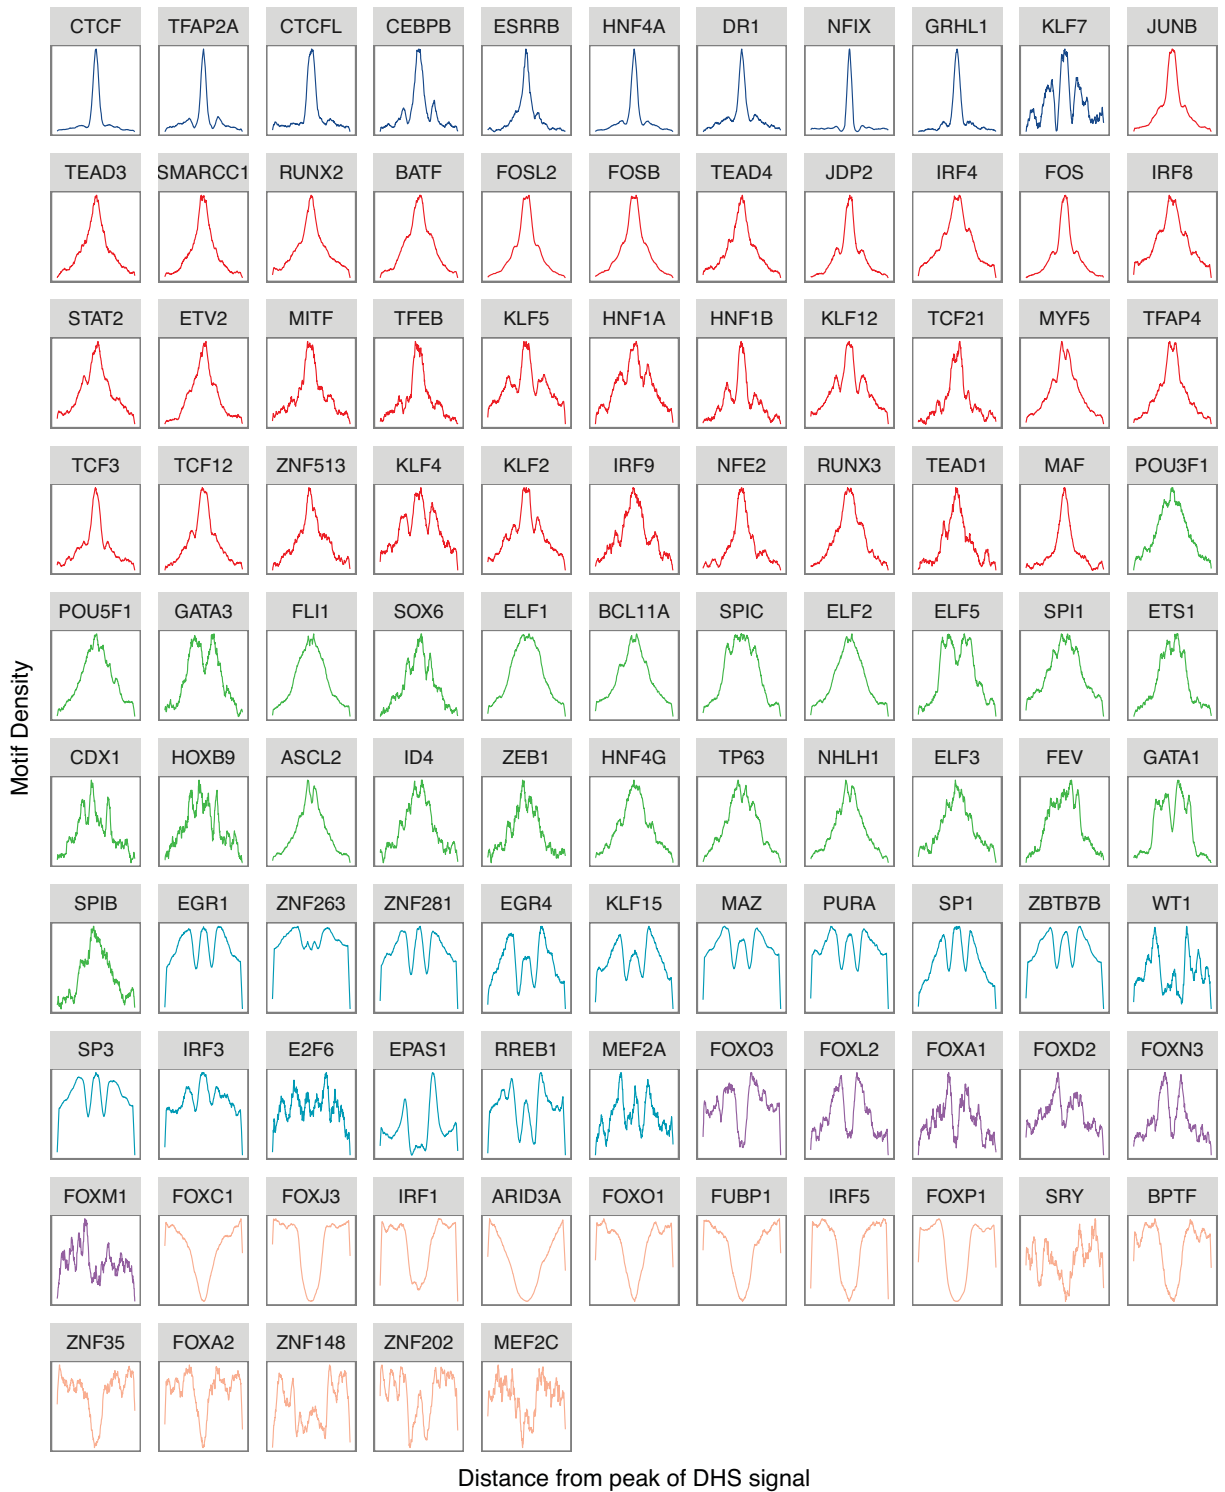

**Fig. S6. Motif position profiles of 103 TF motifs.** Motif position profiles for each TF were calculated using NDRs in all cell types that contained the motif among the top 20 most enriched motifs. Motif sites were collapsed to their central position, and the density of motif sites in 20-bp bins tiled every 1 bp across 400 bp centered around the peak of the DHS signal is shown. Motif position profiles are colored by their cluster (blue - cluster 1; red – cluster 2; green – cluster 3; cyan – cluster 4; purple – cluster 5; orange – cluster 6).

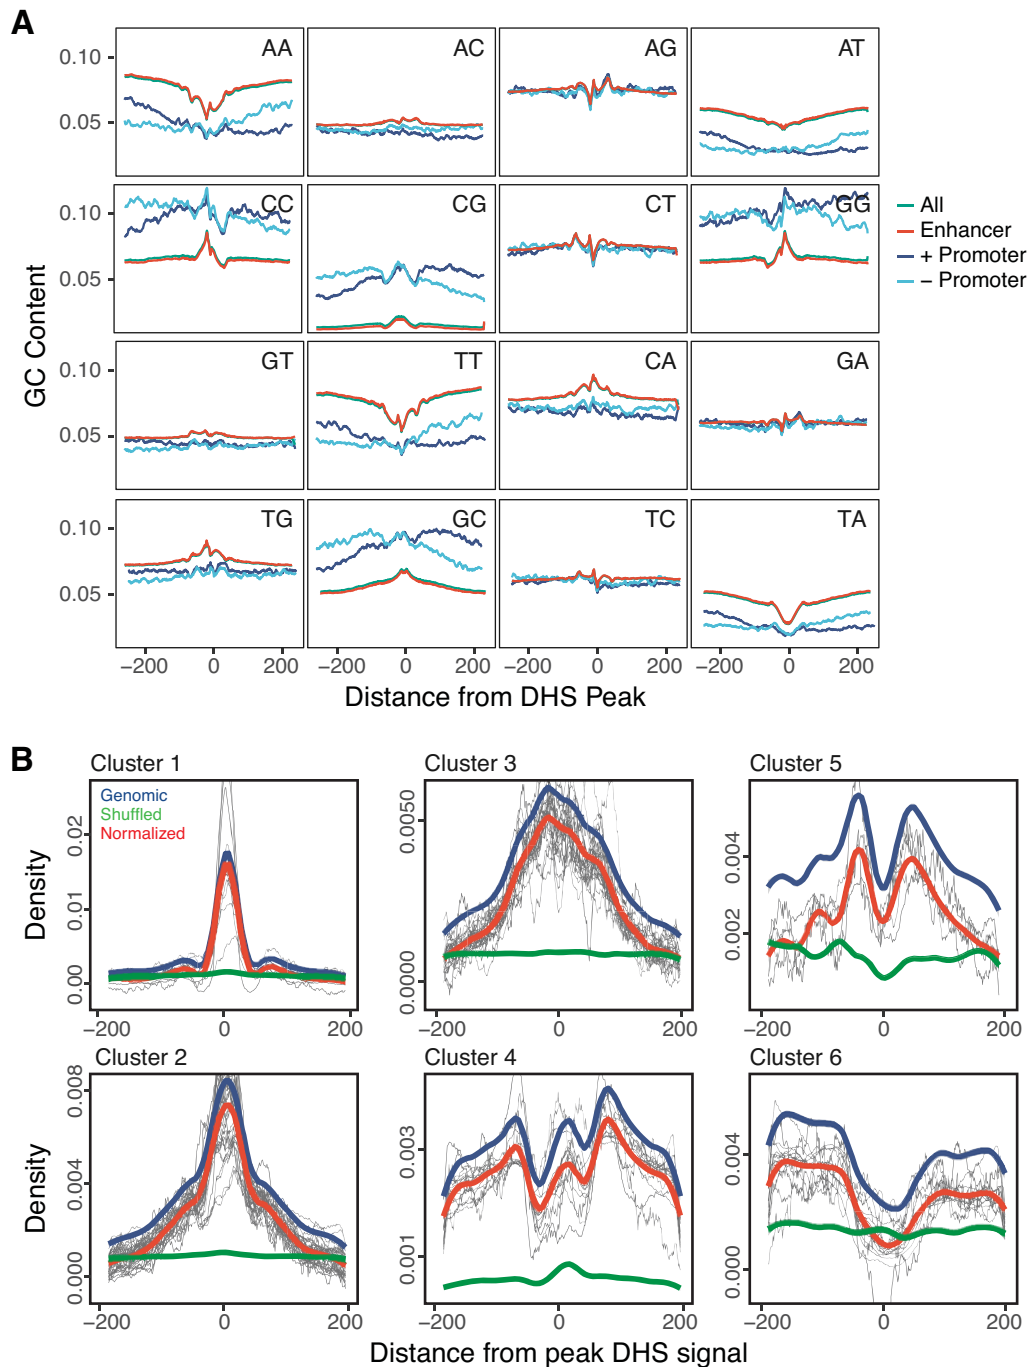

**Fig. S7. Variation in dinucleotide content does not account for motif position patterns.** (A) Average dinucleotide content as a function of distance from the peak of the DHS signal for all NDRs (green lines), distal enhancers (>1kb from annotated TSS; yellow lines), and promoters (<1kb from annotated TSS) on the plus strand (dark blue lines) and minus strand (light blue lines). (B) To control for variation in dinucleotide frequency across the regions, we calculated the background density profiles for each motif in shuffled sequences holding dinucleotide content at each position, and normalized the genomic density profiles by subtracting the background density profiles. Plots show the average cluster profiles for each motif in genomic sequences (blue lines, same as Fig. 5A), shuffled sequences (green lines), and the normalized density profiles (red lines).

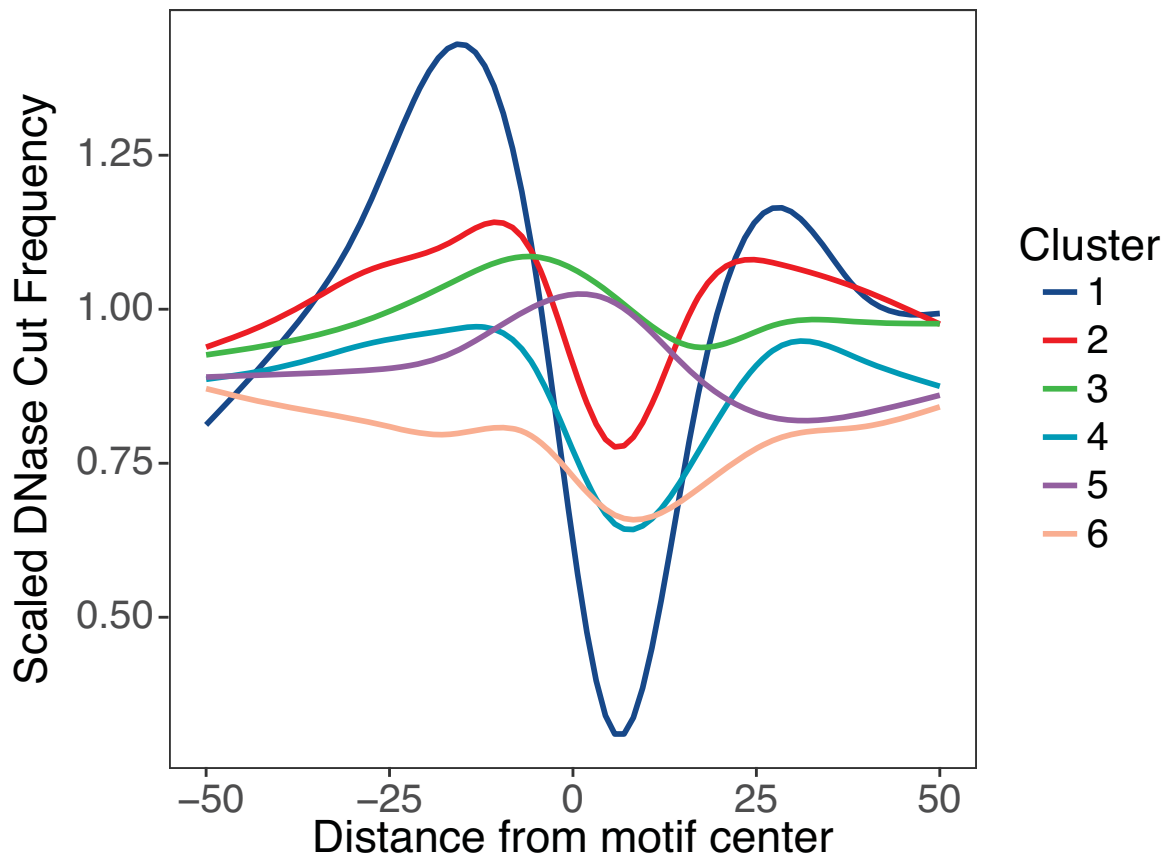

**Fig. S8. Average DNase footprints of motifs in each TF cluster.** Cut count profiles for each TF motif were averaged over all motif sites within NDRs. Cut count profiles for each TF were scaled to a mean of zero, and averaged over all TFs in each cluster.

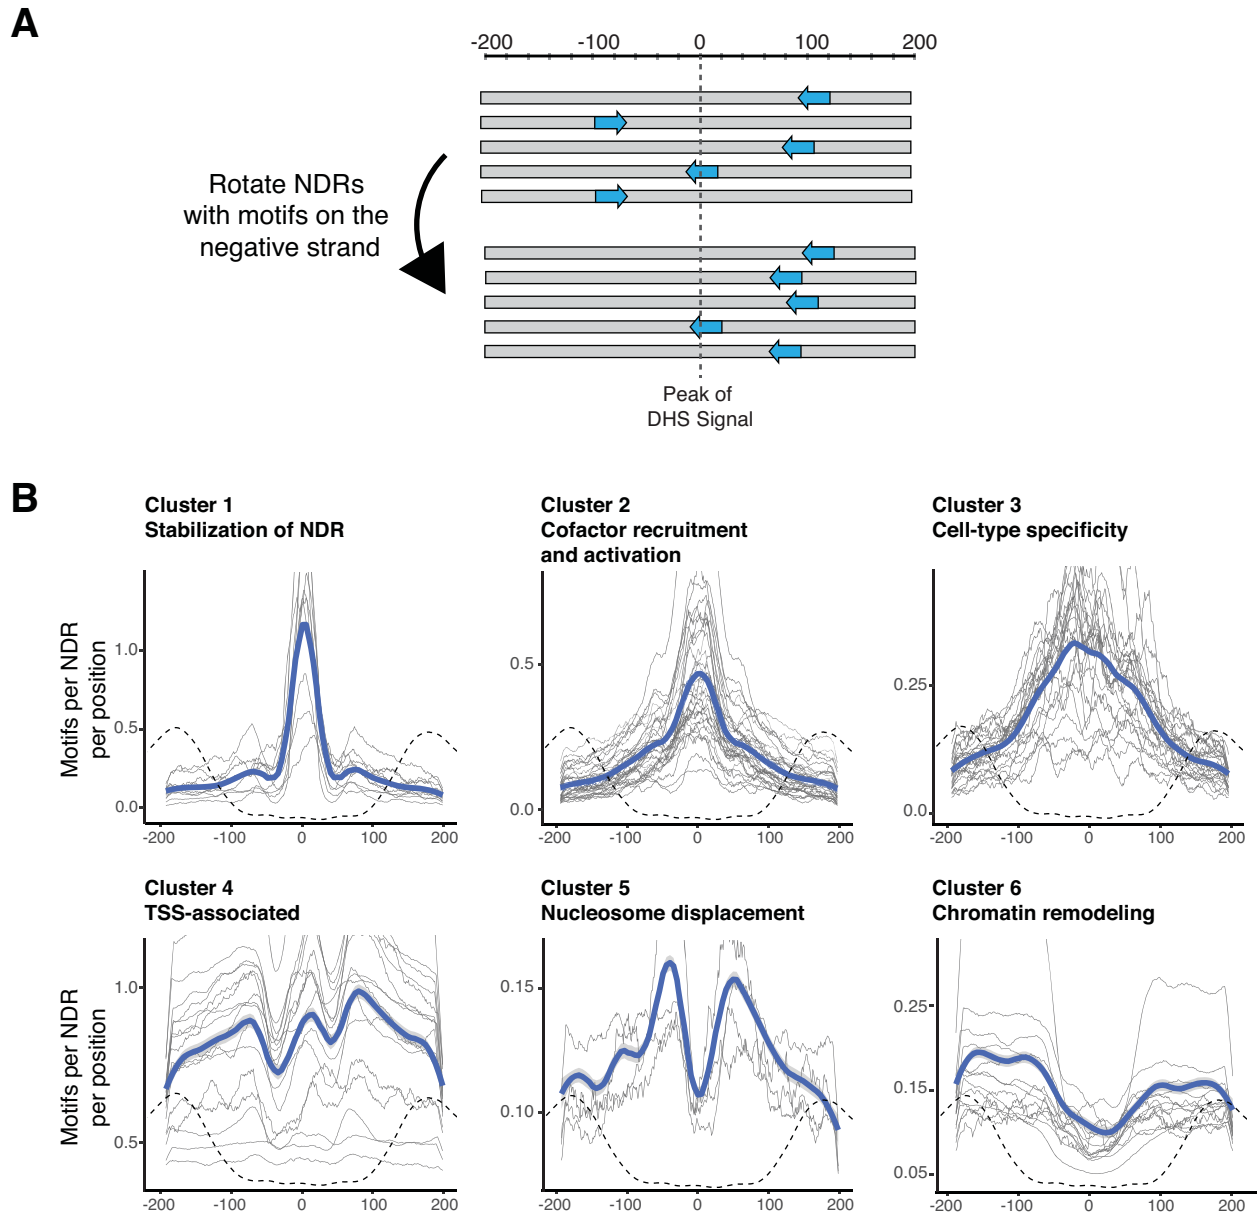

**Fig. S9. Directional TF motif density for the 6 clusters.** (A) Schematic of asymmetric motif analysis. For each asymmetric TF motif, we considered both the motif sequence and its reverse-complementary sequence. When we oriented the NDRs so that the sequence occurred on the ‘positive’ strand, we found that the sequences showed a clear preferred orientation relative to the center of the NDRs—that is, either the motif sequence or its reverse-complementary sequences preferentially points inward. In aggregating across the motifs in Clusters 4 and 6, we chose the motif sequence that pointed inward. Density profiles were then calculated using the aligned NDRs. Asymmetric occupancy profiles indicate that the TFs binds with a preferred orientation relative to the center of the NDR. (B) Motifs were aligned on the same strand, and motif density profiles in 400 bp regions centered around the peak of the DHS signal (gray lines) were calculated for each TF in each of the 6 clusters. Blue line depicts the overall density profile of the cluster, calculated by fitting a loess model with span=0.2. MNase-seq read density (indicating the position of the flanking nucleosomes) is shown in dotted lines for context.

## A Cluster 4 motifs

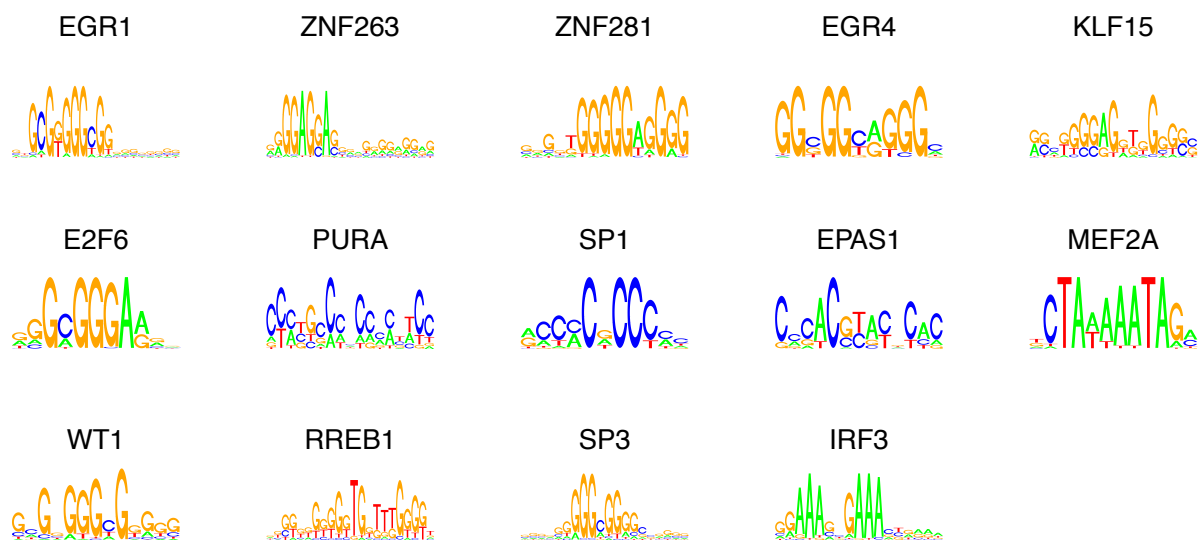

## B Cluster 6 motifs

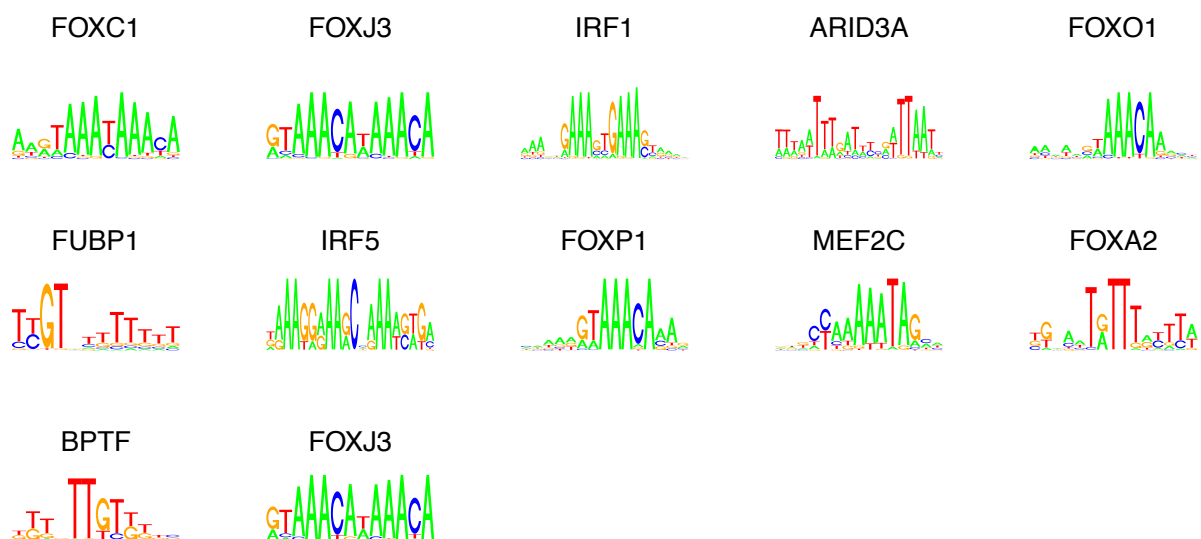

**Fig. S10. Asymmetric motifs from clusters 4 and 6 that show a preferred orientation relative to the center of the NDR.** Sequences of TF motifs in cluster 4 (A) and cluster 6 (B) that have asymmetric occupancy profiles around the NDR center.



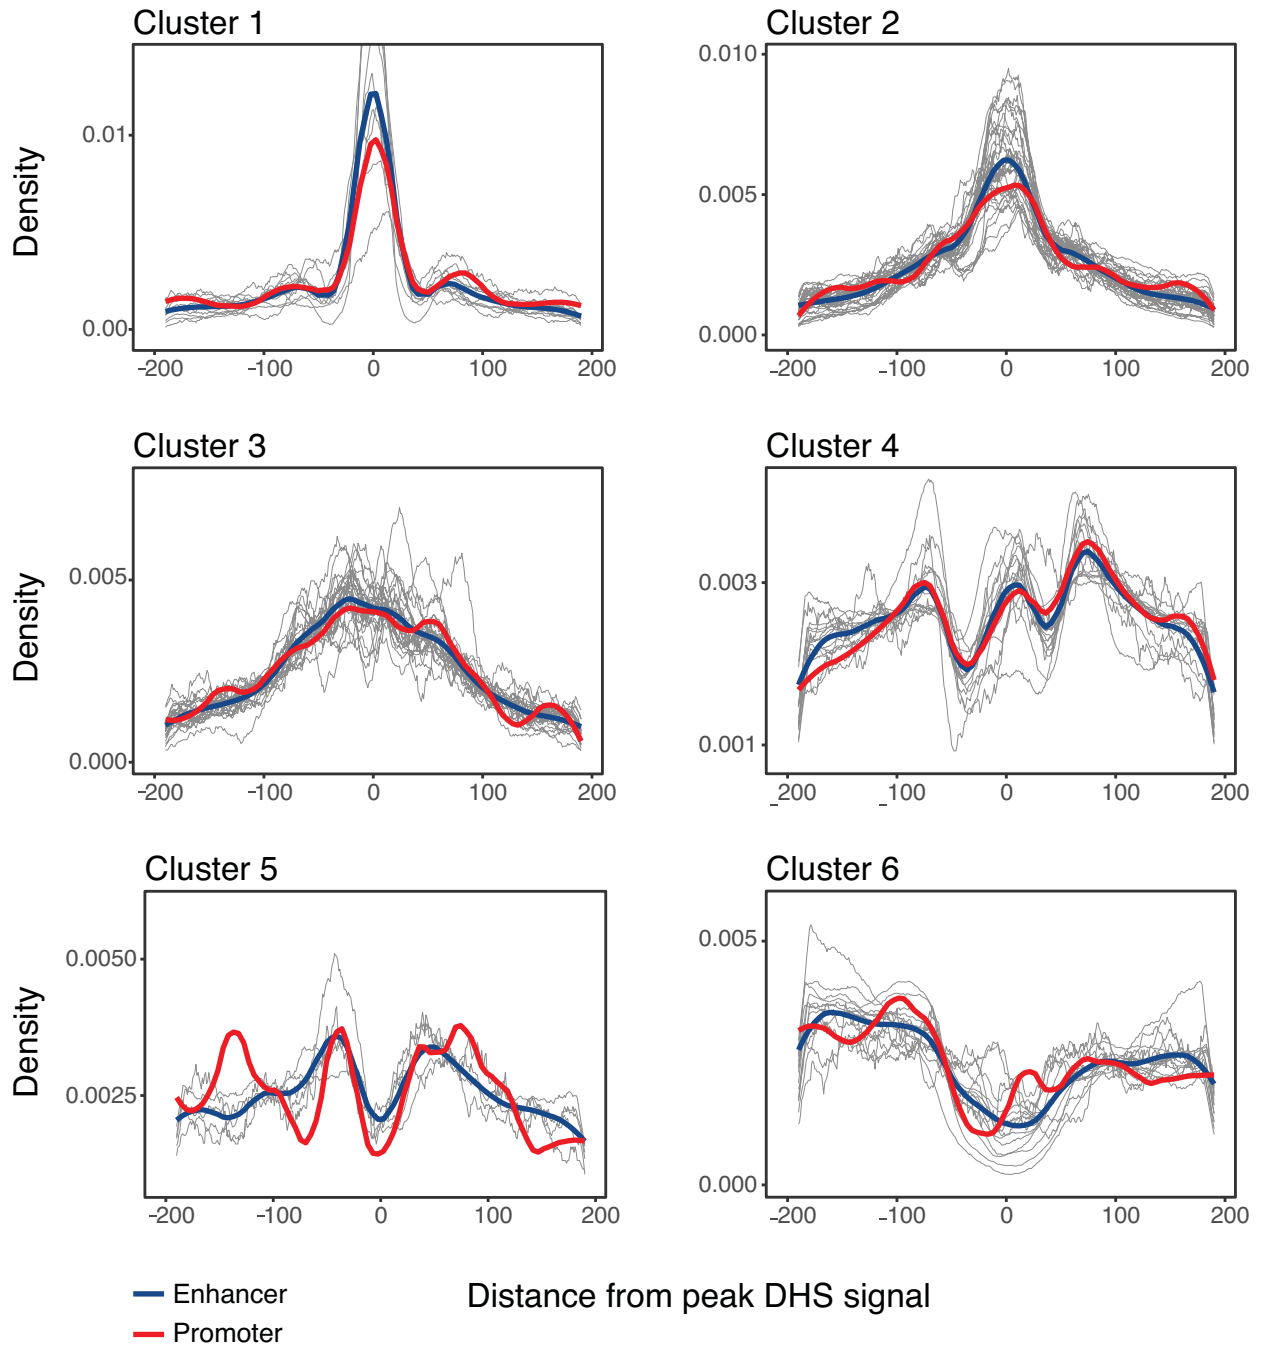

**Fig. S11. Motif density profiles at promoters versus enhancers.** Motif sites for each NDRs were split into promoters (<1 kb from an annotated TSS; red lines) and enhancers (>1 kb from an annotated TSS; blue lines). TF were aligned on the same strand, and the density of motif sites in 20-bp bins tiled every 1 bp in 400 bp regions centered around the peak of the DHS signal was calculated.

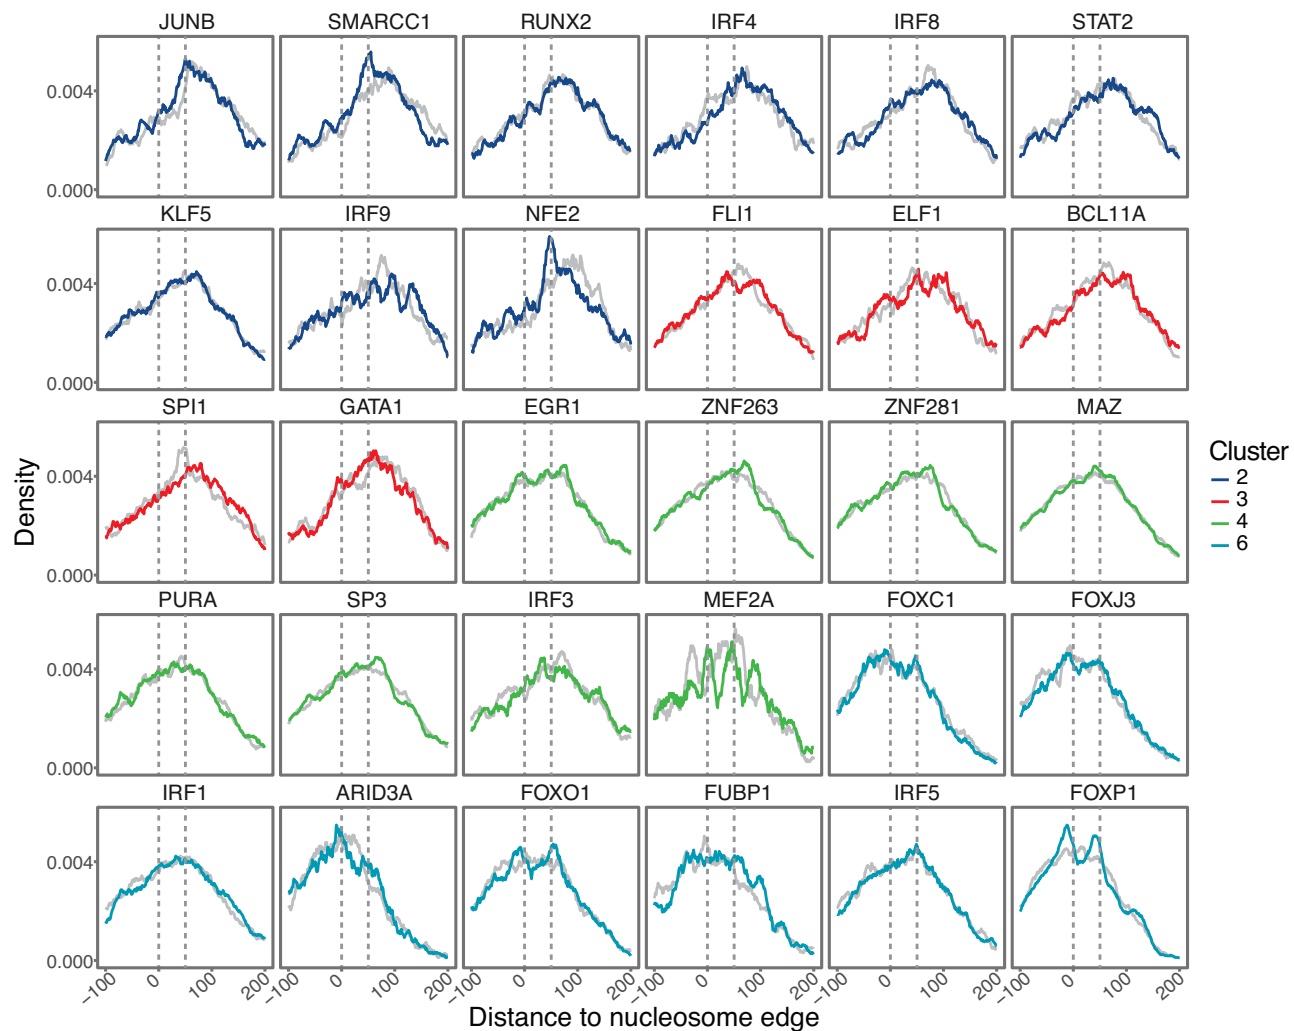

**Fig. S12. Motif density relative to flanking nucleosome edge.** The edges of the nucleosomes flanking each NDR were estimated from MNase-seq data (see Methods), and TF motifs were aligned relative to the nearest flanking nucleosome. Density plots represent the frequency of motif sites in 20-bp bins tiled every 1 bp in genomic NDRs (colored lines) and permuted data (gray line; permuting nucleosome position across motif sites).

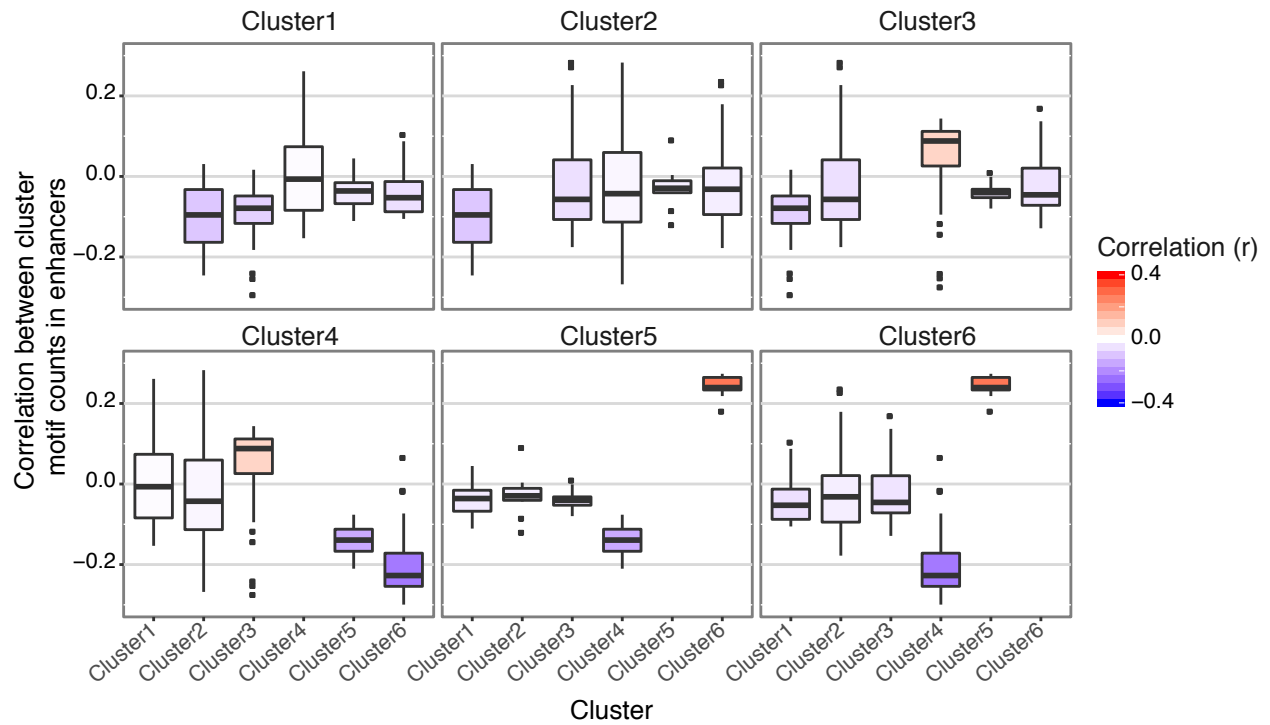

**Fig. S13. Co-enrichment and -depletion of TF motif clusters is constant across cell types.** For each pair of clusters, the correlation (Spearman  $\rho$ ) between the number of motif sites in NDRs from cluster A and cluster B was calculated in each cell type. Positively correlated cluster pairs tend to occur together in NDRs, whereas negatively cluster pairs are co-depleted. Boxplots depict the range of  $\rho$  values for each cluster pair across the 47 cell types. The correlations of motif counts from each pair of clusters is relatively constant across cell types, indicating the clusters may represent general functional classes of TFs that interact similarly in different cellular contexts.

**Table S1. TF motifs clusters identified based on the positional distribution of motif sites within NDRs**

|           | Family | TF     | Motif symmetry | Cofactor binding        | AA Bias       | Median genomic enrichment | Number of cell types with enrichment | Median expression [range]            | Cells                                                                                                                                                                       |
|-----------|--------|--------|----------------|-------------------------|---------------|---------------------------|--------------------------------------|--------------------------------------|-----------------------------------------------------------------------------------------------------------------------------------------------------------------------------|
| Cluster 1 | AP2    | TFAP2A | S              |                         |               | 2.20                      | 16                                   | 84.8                                 | ESDR.H1.BMP4.TROP, PLCNT.FET                                                                                                                                                |
|           | CEBP   | CEBPB  |                |                         |               | 3.39                      | 50                                   | n.d.                                 | BLD.CD14.PC, BLD.CD14.MONO                                                                                                                                                  |
|           | CTCF   | CTCF   |                |                         |               | 2.43                      | 57                                   | 35.2 [30.7-39.8]                     | ESC.H1, ESC.H9, IPSC.DF.19.11, BLD.CD3.PPC, GI.STMC.FET, LNG.A549.ETOH002.CNCR, CLN.HCT116                                                                                  |
|           |        | CTCFL  |                | TBP                     |               | 1.57                      | 1                                    | n.d.                                 | ESC.H9                                                                                                                                                                      |
|           | GRHL1  | GRHL1  | S              |                         |               | 4.39                      | 2                                    | n.d.                                 | PLCNT.FET                                                                                                                                                                   |
|           | KLF    | KLF7   |                |                         |               | 2.66                      | 40                                   | n.d.                                 | PLCNT.FET                                                                                                                                                                   |
|           | NFI    | NFIX   | S              |                         |               | 2.30                      | 36                                   | 54.5                                 | MUS.TRNK.FET, MUS.LEG.FET, OVRY                                                                                                                                             |
|           | NR     | DR1    |                |                         |               | 2.23                      | 57                                   | 21.3                                 | GI.L.INT.FET                                                                                                                                                                |
|           |        | ESRRB  |                |                         |               | 3.30                      | 1                                    | n.d.                                 | ADRL.GLND.FET                                                                                                                                                               |
| HNF4A     |        |        | TBP            |                         | 3.84          | 13                        | 132.9 [97.6-170.9]                   | GI.L.INT.FET, GI.S.INT.FET, GI.S.INT |                                                                                                                                                                             |
| Cluster 2 | AP-1   | FOS    | S              | p300, CBP, SWI/SNF, RB1 |               | 4.02                      | 51                                   | 17.2 [15.8-214.2]                    | BLD.CD14.PC, SKIN.PEN.FRSK.MEL.01, ADRL.GLND.FET, MUS.PSOAS, GI.S.INT, MUS.HSMMT, BLD.CD14.MONO, SKIN.NHDFAD                                                                |
|           |        | FOSB   |                |                         |               | 4.34                      | 29                                   | 2.4 [0.1-90.5]                       | ESDR.H1.MSC, SKIN.PEN.FRSK.FIB.01, SKIN.PEN.FRSK.FIB.02, LNG.A549.ETOH002.CNCR, CRVX.HELAS3.CNCR, BRST.HMEC, VAS.HUVEC, SKIN.NHEK, LNG.NHLF                                 |
|           |        | FOSL2  | S              |                         |               | 5.79                      | 44                                   | 25.8 [12.7-45.2]                     | ESDR.H1.MSC, SKIN.PEN.FRSK.FIB.01, SKIN.PEN.FRSK.FIB.02, LNG.A549.ETOH002.CNCR, CRVX.HELAS3.CNCR, BRST.HMEC, MUS.HSMM, VAS.HUVEC, SKIN.NHEK, LNG.NHLF                       |
|           |        | JDP2   | S              |                         |               | 6.15                      | 26                                   | n.d.                                 | LNG.IMR90, BRN.NHA                                                                                                                                                          |
|           |        | JUNB   | S              | p300, SWI/SNF           |               | 3.07                      | 54                                   | 64.9 [2.2-329.2]                     | ESDR.H1.BMP4.MESO, ESDR.H1.BMP4.TROP, BLD.CD14.PC, SKIN.PEN.FRSK.MEL.01, ADRL.GLND.FET, GI.L.INT.FET, GI.STMC.GAST, PANC, MUS.PSOAS, GI.S.INT, BLD.K562.CNCR, BLD.CD14.MONO |
|           |        | BATF   |                | KDM1A                   |               | 2.58                      | 11                                   | 0.0 [0.0-0.3]                        | ESDR.H1.MSC, LNG.IMR90, SKIN.PEN.FRSK.FIB.01, SKIN.PEN.FRSK.FIB.02, CRVX.HELAS3.CNCR, BRST.HMEC, BRN.NHA, SKIN.NHDFAD, SKIN.NHEK, LNG.NHLF, CLN.HCT116                      |
|           |        | MAF    |                | CBP, HDAC               |               | 2.86                      | 29                                   | n.d.                                 | CLN.HCT116                                                                                                                                                                  |
|           |        | NFE2   |                | p300, CBP               | Poly-pro      | 2.52                      | 5                                    | 143.2                                | BLD.K562.CNCR                                                                                                                                                               |
|           |        | bHLH   | TFAP4          | S                       | SWI/SNF, HDAC | Poly-pro                  | 2.42                                 | 42                                   | 2.5                                                                                                                                                                         |

|                         |         |   |                                                   |                               |      |    |                       |                                                                                                                             |
|-------------------------|---------|---|---------------------------------------------------|-------------------------------|------|----|-----------------------|-----------------------------------------------------------------------------------------------------------------------------|
|                         | TCF3    |   | p300,<br>CBP,<br>HDAC,<br>KAT2B,<br>KDM1A,<br>RB1 |                               | 2.14 | 56 | n.d.                  | MUS.TRNK.FET, MUS.LEG.FET,<br>THYM.FET                                                                                      |
|                         | TCF12   | S | p300,<br>CBP                                      |                               | 2.32 | 57 | 5.9                   | MUS.LEG.FET, THYM.FET, PANC                                                                                                 |
|                         | TCF21   | S |                                                   |                               | 3.26 | 13 | n.d.                  | MUS.TRNK.FET                                                                                                                |
|                         | MITF    |   |                                                   |                               | 2.41 | 14 | 63.9                  | SKIN.PEN.FRSK.MEL.01                                                                                                        |
|                         | MYF5    | S |                                                   |                               | 2.63 | 1  | 2.6 [0.0-<br>558.1]   | MUS.TRNK.FET, MUS.LEG.FET,<br>PANC, MUS.PSOAS, MUS.HSMM,<br>MUS.HSMMT                                                       |
|                         | TFEB    | S |                                                   | Poly-<br>pro                  | 3.75 | 19 | 4.4                   | SKIN.PEN.FRSK.MEL.01                                                                                                        |
| ETS                     | ETV2    |   |                                                   |                               | 3.76 | 0  | 0.5 [0.4-<br>0.6]     | BLD.CD3.PPC, BLD.CD56.PC,<br>BLD.MOB.CD34.PC.F,<br>VAS.HUVEC, BLD.Jurkat                                                    |
| IRF                     | IRF4    |   |                                                   |                               | 2.07 | 11 | 0.0 [0.0-<br>229.4]   | LNG.IMR90,<br>SKIN.PEN.FRSK.FIB.02,<br>BLD.GM12878, BRST.HMEC,<br>VAS.HUVEC, BRN.NHA,<br>SKIN.NHEK, LNG.NHLF,<br>CLN.HCT116 |
|                         | IRF8    |   |                                                   |                               | 2.74 | 14 | 104.6 [4.4-<br>204.8] | BLD.CD14.PC, BLD.CD19.PPC,<br>BLD.MOB.CD34.PC.F,<br>BLD.GM12878, BLD.CD14.MONO,<br>BLD.U937                                 |
|                         | IRF9    |   |                                                   |                               | 3.50 | 46 | 43.7                  | BLD.GM12878                                                                                                                 |
| Zinc<br>finger,<br>C2H2 | KLF12   |   |                                                   |                               | 3.05 | 20 | 2.4 [1.1-<br>6.7]     | GI.S.INT.FET, GI.S.INT,<br>CRVX.HELAS3.CNCR,<br>SKIN.NHEK, CLN.HCT116                                                       |
|                         | KLF2    |   | KAT2B                                             | Poly-<br>ala,<br>Poly-<br>pro | 2.66 | 34 | 15.5 [0.1-<br>31.0]   | GI.S.INT, CRVX.HELAS3.CNCR                                                                                                  |
|                         | KLF4    |   | p300,<br>CBP,<br>HDAC,<br>SWI/SNF                 | Poly-<br>pro                  | 2.20 | 33 | 18.8 [17.9-<br>19.6]  | GI.STMC.GAST, SKIN.NHEK                                                                                                     |
|                         | KLF5    |   | p300,<br>CBP,<br>YAP1,<br>HDAC                    |                               | 2.23 | 29 | 65.3 [0.5-<br>101.7]  | GI.L.INT.FET, BRST.HMEC,<br>MUS.HSMMT, BLD.K562.CNCR,<br>SKIN.NHDFAD                                                        |
|                         | ZNF513  |   |                                                   |                               | 2.50 | 53 | n.d.                  | MUS.LEG.FET, SKIN.NHDFAD                                                                                                    |
| RUNX                    | RUNX2   |   | p300,<br>RB1                                      | Poly-<br>ala                  | 2.36 | 8  | 3.3 [0.0-<br>7.8]     | ESDR.H1.MSC, BLD.CD3.PPC,<br>BLD.CD56.PC, BLD.GM12878,<br>MUS.HSMM, MUS.HSMMT,<br>BRN.NHA, LNG.NHLF, BLD.Jurkat             |
|                         | RUNX3   |   | p300                                              |                               | 3.33 | 12 | 0.8                   | BRN.NHA, LNG.NHLF, BLD.Jurkat                                                                                               |
| SMARCC                  | SMARCC1 | S | SWI/SNF,<br>KDM1A                                 | Poly-<br>pro,<br>Poly-<br>ala | 3.12 | 57 | 42.1 [41.5-<br>42.6]  | ESDR.H1.BMP4.TROP,<br>BLD.K562.CNCR                                                                                         |
| STAT                    | STAT2   |   | p300,<br>CBP,<br>SWI/SNF                          |                               | 3.46 | 56 | 35.4                  | BLD.CD19.PPC, BLD.CD56.PC,<br>BLD.GM12878                                                                                   |
| TCF                     | HNF1B   | S |                                                   |                               | 4.50 | 9  | 7.9 [6.1-<br>9.6]     | GI.S.INT.FET, GI.S.INT                                                                                                      |

|           |          |        |   |                        |                |      |      |                       |                                                                                                                                     |                                                                                                                                                                                                                                                   |
|-----------|----------|--------|---|------------------------|----------------|------|------|-----------------------|-------------------------------------------------------------------------------------------------------------------------------------|---------------------------------------------------------------------------------------------------------------------------------------------------------------------------------------------------------------------------------------------------|
|           |          | HNF1A  | S | p300,<br>CBP,<br>KAT2B |                | 4.13 | 7    | 8.4 [4.5-<br>19.1]    | GI.L.INT.FET, GI.STMC.GAST,<br>PANC, LIV.HEPG2.CNCR                                                                                 |                                                                                                                                                                                                                                                   |
|           | TEAD     | TEAD1  |   |                        | Poly-<br>pro   | 2.34 | 48   | 45.7                  | LNG.NHLF                                                                                                                            |                                                                                                                                                                                                                                                   |
|           |          | TEAD3  |   | YAP1                   |                | 3.20 | 45   | 97.5 [34.8-<br>160.2] | ESDR.H1.BMP4.MESO,<br>ESDR.H1.BMP4.TROP,<br>IPSC.DF.6.9, BRN.NHA                                                                    |                                                                                                                                                                                                                                                   |
|           |          | TEAD4  |   | YAP1                   |                | 2.95 | 42   | 48.6                  | ESC.H9, PLCNT.FET, MUS.HSMM,<br>MUS.HSMMT                                                                                           |                                                                                                                                                                                                                                                   |
| Cluster 3 | bHLH     | ASCL2  |   |                        |                | 3.23 | 4    | 0.0 [0.0-<br>0.0]     | MUS.TRNK.FET, MUS.PSOAS,<br>MUS.HSMM, MUS.HSMMT                                                                                     |                                                                                                                                                                                                                                                   |
|           |          | ID4    |   |                        |                | 2.26 | 31   | 24.8                  | PANC                                                                                                                                |                                                                                                                                                                                                                                                   |
|           |          | NHLH1  |   |                        |                | 3.08 | 2    | 0.3                   | MUS.HSMM, MUS.HSMMT                                                                                                                 |                                                                                                                                                                                                                                                   |
|           | BCL11A   | BCL11A |   |                        |                | 2.59 | 10   | 0.0 [0.0-<br>12.9]    | BLD.CD14.PC, BLD.CD19.PPC,<br>BLD.CD3.PPC, BLD.CD56.PC,<br>BLD.MOB.CD34.PC.F,<br>BLD.GM12878, VAS.HUVEC,<br>BLD.CD14.MONO, BLD.U937 |                                                                                                                                                                                                                                                   |
|           | ETS      | ETS1   |   |                        | p300,<br>MED23 |      | 3.41 | 49                    | 31.3                                                                                                                                | BLD.MOB.CD34.PC.F                                                                                                                                                                                                                                 |
|           |          | ELF1   |   |                        |                |      | 3.01 | 53                    | 28.9 [16.2-<br>144.6]                                                                                                               | BLD.CD14.PC, BLD.CD19.PPC,<br>BLD.CD3.PPC, BLD.CD56.PC,<br>BLD.MOB.CD34.PC.F, THYM.FET,<br>GI.STMC.GAST, GI.S.INT,<br>BLD.GM12878, VAS.HUVEC,<br>BLD.CD14.MONO, CLN.HCT116,<br>BLD.Jurkat, BLD.U937, UBIQ                                         |
|           |          | ELF2   |   |                        |                |      | 2.47 | 41                    | 9.3 [4.6-<br>14.0]                                                                                                                  | BLD.CD14.PC, BLD.CD19.PPC,<br>BLD.CD3.PPC, BLD.CD56.PC,<br>BLD.MOB.CD34.PC.F, THYM.FET,<br>VAS.HUVEC, BLD.CD14.MONO,<br>BLD.Jurkat, BLD.U937                                                                                                      |
|           |          | ELF3   |   |                        | p300,<br>MED23 |      | 2.67 | 18                    | 0.0                                                                                                                                 | VAS.HUVEC                                                                                                                                                                                                                                         |
|           |          | ELF5   |   |                        |                |      | 2.86 | 0                     | 0.0 [0.0-<br>0.1]                                                                                                                   | BLD.CD14.PC,<br>BLD.MOB.CD34.PC.F,<br>GI.STMC.GAST, VAS.HUVEC,<br>BLD.U937                                                                                                                                                                        |
|           |          | FEV    |   |                        |                |      | 3.63 | 3                     | 0.0                                                                                                                                 | VAS.HUVEC                                                                                                                                                                                                                                         |
|           |          | FLI1   |   |                        |                |      | 2.95 | 15                    | 1.9 [0.0-<br>52.4]                                                                                                                  | ESDR.H1.BMP4.MESO,<br>ESDR.H1.MSC, BLD.CD14.PC,<br>BLD.CD19.PPC, BLD.CD3.PPC,<br>BLD.CD56.PC,<br>SKIN.PEN.FRSK.FIB.02,<br>SKIN.PEN.FRSK.MEL.01,<br>THYM.FET, MUS.PSOAS,<br>BLD.GM12878, VAS.HUVEC,<br>BLD.K562.CNCR,<br>BLD.CD14.MONO, CLN.HCT116 |
|           |          | SPI1   |   |                        |                |      | 2.40 | 18                    | 23.7 [4.0-<br>43.5]                                                                                                                 | BLD.CD56.PC,<br>BLD.MOB.CD34.PC.F,<br>BLD.GM12878, BLD.Jurkat                                                                                                                                                                                     |
|           |          | SPIC   |   |                        |                |      | 3.84 | 1                     | n.d.                                                                                                                                | BLD.CD14.PC, BLD.CD19.PPC,<br>BLD.CD14.MONO                                                                                                                                                                                                       |
|           | GATA     | GATA1  |   |                        | p300,<br>MED17 |      | 4.54 | 3                     | 125.2                                                                                                                               | BLD.K562.CNCR                                                                                                                                                                                                                                     |
|           |          | GATA3  |   |                        |                |      | 3.22 | 19                    | 3.0 [0.1-<br>5.8]                                                                                                                   | ESDR.H1.BMP4.MESO,<br>GI.STMC.GAST                                                                                                                                                                                                                |
|           | NR       | HNF4G  |   |                        |                |      | 2.59 | 7                     | 8.4                                                                                                                                 | LIV.HEPG2.CNCR                                                                                                                                                                                                                                    |
|           | P63      | TP63   | S |                        | p300           |      | 2.98 | 8                     | 68.3 [45.8-<br>90.8]                                                                                                                | BRST.HMEC, SKIN.NHEK                                                                                                                                                                                                                              |
|           | Homeobox | POU3F1 |   |                        |                |      | 4.69 | 10                    | 15.7                                                                                                                                | ESC.H1, ESC.H9, IPSC.DF.6.9,<br>IPSC.DF.19.11                                                                                                                                                                                                     |

|           |       |        |                                |               |          |      |                  |                                                                                                             |                                                                                                                                                                                                                                                                                                                                                                                                                                               |
|-----------|-------|--------|--------------------------------|---------------|----------|------|------------------|-------------------------------------------------------------------------------------------------------------|-----------------------------------------------------------------------------------------------------------------------------------------------------------------------------------------------------------------------------------------------------------------------------------------------------------------------------------------------------------------------------------------------------------------------------------------------|
|           |       | POU5F1 |                                |               |          | 4.19 | 7                | 204.7<br>[183.0-226.4]                                                                                      | ESC.H1, ESDR.H1.BMP4.MESO,<br>ESC.H9, IPSC.DF.6.9,<br>IPSC.DF.19.11                                                                                                                                                                                                                                                                                                                                                                           |
|           |       | POU5F1 |                                |               |          | 4.19 | 7                | 204.7<br>[183.0-226.4]                                                                                      | ESC.H1, ESDR.H1.BMP4.MESO,<br>ESC.H9, IPSC.DF.6.9,<br>IPSC.DF.19.11                                                                                                                                                                                                                                                                                                                                                                           |
|           |       | CDX1   |                                |               |          | 2.70 | 5                | 84.4 [65.7-103.0]                                                                                           | GI.L.INT.FET, GI.S.INT.FET                                                                                                                                                                                                                                                                                                                                                                                                                    |
|           |       | HOXB9  |                                |               |          | 2.48 | 10               | 10.8                                                                                                        | GI.S.INT.FET                                                                                                                                                                                                                                                                                                                                                                                                                                  |
|           |       | ZEB1   |                                | p300          |          | 2.26 | 41               | 6.5                                                                                                         | PANC                                                                                                                                                                                                                                                                                                                                                                                                                                          |
|           | SOX   | SOX6   |                                |               |          | 2.38 | 5                | 3.6                                                                                                         | ESDR.H1.NEUR.PROG                                                                                                                                                                                                                                                                                                                                                                                                                             |
|           |       | SPIB   |                                |               |          | 3.10 | 13               | n.d.                                                                                                        | BLD.U937                                                                                                                                                                                                                                                                                                                                                                                                                                      |
| Cluster 4 | E2F   | E2F6   |                                | HDAC          |          | 1.98 | 27               | 7.3                                                                                                         | ESDR.H1.NEUR.PROG                                                                                                                                                                                                                                                                                                                                                                                                                             |
|           | EGR   | EGR1   |                                | p300          |          | 2.46 | 50               | 11.2 [4.8-130.3]                                                                                            | ESC.H1, ESDR.H1.NEUR.PROG,<br>ESC.H9, IPSC.DF.6.9,<br>IPSC.DF.19.11, MUS.TRNK.FET,<br>GI.STMC.FET, THYM.FET, OVRY,<br>LIV.HEPG2.CNCR,<br>BLD.K562.CNCR, UBIQ                                                                                                                                                                                                                                                                                  |
|           |       | EGR4   |                                |               |          | 1.87 | 2                | 0.0                                                                                                         | ESC.H1, IPSC.DF.19.11, UBIQ                                                                                                                                                                                                                                                                                                                                                                                                                   |
|           | EPAS2 | EPAS1  |                                | p300,<br>CBP  |          | 5.26 | 43               | 28.5 [0.1-163.0]                                                                                            | ESDR.H1.NEUR.PROG,<br>LNG.IMR90,<br>SKIN.PEN.FRSK.FIB.01,<br>SKIN.PEN.FRSK.FIB.02,<br>GI.L.INT.FET, MUS.TRNK.FET,<br>GI.STMC.FET, BRST.HMEC,<br>BRN.NHA, SKIN.NHDFAD,<br>LNG.NHLF                                                                                                                                                                                                                                                             |
|           | IRF   | IRF3   |                                | p300,<br>CBP  | Poly-pro | 2.22 | 56               | 32.6 [10.9-44.3]                                                                                            | ESDR.H1.MSC,<br>ESDR.H1.NEUR.PROG,<br>LNG.IMR90, BLD.CD14.PC,<br>BLD.CD19.PPC, BLD.CD3.PPC,<br>BLD.CD56.PC,<br>BLD.MOB.CD34.PC.F,<br>SKIN.PEN.FRSK.FIB.01,<br>GI.S.INT.FET, MUS.TRNK.FET,<br>OVRY, MUS.PSOAS,<br>BLD.GM12878, BRST.HMEC,<br>VAS.HUVEC, BLD.CD14.MONO,<br>BLD.U937                                                                                                                                                             |
|           | KLF   | KLF15  |                                | p300          |          | 2.01 | 25               | 5.5 [5.2-5.9]                                                                                               | ESC.H1, ESDR.H1.NEUR.PROG,<br>ESC.H9, IPSC.DF.6.9,<br>IPSC.DF.19.11                                                                                                                                                                                                                                                                                                                                                                           |
|           | MEF   | MEF2A  |                                | p300,<br>HDAC |          | 3.77 | 57               | 28.3 [27.7-28.9]                                                                                            | ADRL.GLND.FET, MUS.PSOAS,<br>BLD.GM12878, MUS.HSMMT                                                                                                                                                                                                                                                                                                                                                                                           |
|           | PUR   | PURA   |                                |               |          | 2.31 | 46               | 7.1 [2.1-13.1]                                                                                              | ESC.H1, ESDR.H1.BMP4.MESO,<br>ESDR.H1.BMP4.TROP,<br>ESDR.H1.NEUR.PROG, ESC.H9,<br>LNG.IMR90, IPSC.DF.6.9,<br>IPSC.DF.19.11,<br>SKIN.PEN.FRSK.FIB.01,<br>SKIN.PEN.FRSK.FIB.02,<br>ADRL.GLND.FET, GI.S.INT.FET,<br>MUS.LEG.FET, GI.STMC.FET,<br>THYM.FET, GI.STMC.GAST,<br>OVRY, PANC, MUS.PSOAS,<br>GI.S.INT,<br>LNG.A549.ETOH002.CNCR,<br>LIV.HEPG2.CNCR,<br>BLD.K562.CNCR, BRN.NHA,<br>SKIN.NHDFAD, SKIN.NHEK,<br>BLD.Jurkat, BLD.U937, UBIQ |
| SP1       | SP1   |        | p300,<br>DMT1,<br>HDAC,<br>CBP |               | 2.32     | 57   | 25.9 [20.0-38.7] | ESC.H1, ESDR.H1.BMP4.MESO,<br>IPSC.DF.6.9, IPSC.DF.19.11,<br>GI.S.INT.FET, GI.STMC.FET,<br>BLD.Jurkat, UBIQ |                                                                                                                                                                                                                                                                                                                                                                                                                                               |

|                         |        |  |                        |              |      |    |                       |                                                                                                                                                                                                                                                                                                                                                                                                                                                                                                                                                                                                                                                                                                                                           |
|-------------------------|--------|--|------------------------|--------------|------|----|-----------------------|-------------------------------------------------------------------------------------------------------------------------------------------------------------------------------------------------------------------------------------------------------------------------------------------------------------------------------------------------------------------------------------------------------------------------------------------------------------------------------------------------------------------------------------------------------------------------------------------------------------------------------------------------------------------------------------------------------------------------------------------|
|                         |        |  |                        |              |      |    |                       | ESDR.H1.BMP4.TROP,<br>ESDR.H1.NEUR.PROG, ESC.H9,<br>LNG.IMR90,<br>SKIN.PEN.FRSK.FIB.01,<br>SKIN.PEN.FRSK.FIB.02,<br>SKIN.PEN.FRSK.MEL.01,<br>ADRL.GLND.FET, GI.L.INT.FET,<br>GI.S.INT.FET, MUS.TRNK.FET,<br>MUS.LEG.FET, PLCNT.FET,<br>GI.STMC.FET, THYM.FET,<br>GI.STMC.GAST, OVRY, PANC,<br>MUS.PSOAS, GI.S.INT,<br>LNG.A549.ETOH002.CNCR,<br>CRVX.HELAS3.CNCR,<br>LIV.HEPG2.CNCR, BRST.HMEC,<br>MUS.HSMM, MUS.HSMMT,<br>BLD.K562.CNCR, BRN.NHA,<br>SKIN.NHDFAD, SKIN.NHEK,<br>LNG.NHLF, BLD.U937                                                                                                                                                                                                                                       |
| Zinc<br>finger,<br>C2H2 | SP3    |  | p300,<br>DMT1,<br>HDAC |              | 2.44 | 53 | 12.7 [3.6-<br>22.0]   |                                                                                                                                                                                                                                                                                                                                                                                                                                                                                                                                                                                                                                                                                                                                           |
|                         | WT1    |  | DMT1                   | Poly-<br>pro | 2.41 | 2  | 0.5                   | ESDR.H1.BMP4.MESO                                                                                                                                                                                                                                                                                                                                                                                                                                                                                                                                                                                                                                                                                                                         |
|                         | MAZ    |  |                        | Poly-<br>pro | 2.53 | 57 | 88.5 [24.2-<br>436.0] | ESC.H1, ESDR.H1.BMP4.MESO,<br>ESDR.H1.BMP4.TROP,<br>ESDR.H1.MSC,<br>ESDR.H1.NEUR.PROG, ESC.H9,<br>LNG.IMR90, IPSC.DF.6.9,<br>IPSC.DF.19.11, BLD.CD14.PC,<br>BLD.CD19.PPC, BLD.CD3.PPC,<br>BLD.CD56.PC,<br>BLD.MOB.CD34.PC.F,<br>SKIN.PEN.FRSK.FIB.01,<br>SKIN.PEN.FRSK.FIB.02,<br>SKIN.PEN.FRSK.MEL.01,<br>ADRL.GLND.FET, GI.L.INT.FET,<br>GI.S.INT.FET, MUS.TRNK.FET,<br>MUS.LEG.FET, PLCNT.FET,<br>GI.STMC.FET, THYM.FET,<br>GI.STMC.GAST, OVRY, PANC,<br>MUS.PSOAS, GI.S.INT,<br>LNG.A549.ETOH002.CNCR,<br>BLD.GM12878,<br>CRVX.HELAS3.CNCR,<br>LIV.HEPG2.CNCR, BRST.HMEC,<br>MUS.HSMM, MUS.HSMMT,<br>VAS.HUVEC, BLD.K562.CNCR,<br>BLD.CD14.MONO, BRN.NHA,<br>SKIN.NHDFAD, SKIN.NHEK,<br>LNG.NHLF, CLN.HCT116,<br>BLD.Jurkat, BLD.U937 |
|                         | RREB1  |  | HDAC                   | Poly-<br>pro | 3.03 | 29 | 2.4                   | ESDR.H1.NEUR.PROG,<br>GI.STMC.FET, THYM.FET,<br>SKIN.NHDFAD                                                                                                                                                                                                                                                                                                                                                                                                                                                                                                                                                                                                                                                                               |
|                         | ZNF263 |  |                        |              | 2.48 | 53 | 10.4 [3.5-<br>20.1]   | ESC.H1, ESDR.H1.BMP4.MESO,<br>ESDR.H1.BMP4.TROP,<br>ESDR.H1.MSC,<br>ESDR.H1.NEUR.PROG, ESC.H9,<br>LNG.IMR90, IPSC.DF.6.9,<br>IPSC.DF.19.11, BLD.CD14.PC,<br>BLD.CD19.PPC, BLD.CD3.PPC,<br>BLD.CD56.PC,<br>BLD.MOB.CD34.PC.F,<br>SKIN.PEN.FRSK.FIB.01,<br>SKIN.PEN.FRSK.FIB.02,<br>SKIN.PEN.FRSK.MEL.01,<br>ADRL.GLND.FET, GI.L.INT.FET,<br>GI.S.INT.FET, MUS.TRNK.FET,<br>MUS.LEG.FET, PLCNT.FET,<br>GI.STMC.FET, THYM.FET,<br>GI.STMC.GAST, OVRY, PANC,<br>MUS.PSOAS, GI.S.INT,<br>LNG.A549.ETOH002.CNCR,<br>CRVX.HELAS3.CNCR,<br>LIV.HEPG2.CNCR, BRST.HMEC,<br>MUS.HSMM, MUS.HSMMT,<br>VAS.HUVEC, BLD.K562.CNCR,<br>BLD.CD14.MONO, BRN.NHA,<br>SKIN.NHDFAD, SKIN.NHEK,<br>LNG.NHLF, CLN.HCT116,<br>BLD.Jurkat, BLD.U937, UBIQ           |
| ZNF                     | ZBTB7B |  | p300,<br>HDAC          | Poly-<br>pro | 2.41 | 51 | 15.0 [4.3-<br>25.0]   | ESC.H1, ESDR.H1.BMP4.MESO,<br>ESDR.H1.BMP4.TROP,<br>ESDR.H1.NEUR.PROG, ESC.H9,<br>IPSC.DF.6.9, IPSC.DF.19.11,<br>GI.S.INT.FET, MUS.LEG.FET,<br>GI.STMC.FET, OVRY,<br>LIV.HEPG2.CNCR, SKIN.NHDFAD,<br>UBIQ                                                                                                                                                                                                                                                                                                                                                                                                                                                                                                                                 |



|           |      |        |   |       |          |      |    |                 |                                                                                                                                                                                                                                                                                                                                                                                                                                                                                                                                                                                                          |
|-----------|------|--------|---|-------|----------|------|----|-----------------|----------------------------------------------------------------------------------------------------------------------------------------------------------------------------------------------------------------------------------------------------------------------------------------------------------------------------------------------------------------------------------------------------------------------------------------------------------------------------------------------------------------------------------------------------------------------------------------------------------|
|           |      | ZNF281 |   |       | Poly-pro | 2.25 | 43 | 11.0 [2.7-45.1] | ESC.H1, ESDR.H1.BMP4.MESO, ESDR.H1.BMP4.TROP, ESDR.H1.NEUR.PROG, ESC.H9, LNG.IMR90, IPSC.DF.6.9, IPSC.DF.19.11, BLD.CD19.PPC, BLD.CD3.PPC, BLD.CD56.PC, BLD.MOB.CD34.PC.F, SKIN.PEN.FRSK.FIB.01, SKIN.PEN.FRSK.FIB.02, ADRL.GLND.FET, GI.L.INT.FET, GI.S.INT.FET, MUS.TRNK.FET, MUS.LEG.FET, GI.STMC.FET, THYM.FET, GI.STMC.GAST, OVRY, PANC, MUS.PSOAS, LNG.A549.ETOH002.CNCR, LIV.HEPG2.CNCR, MUS.HSMM, MUS.HSMMT, BLD.K562.CNCR, BRN.NHA, SKIN.NHDFAD, SKIN.NHEK, LNG.NHLF, BLD.Jurkat, BLD.U937, UBIQ                                                                                                |
| Cluster 5 | FOX  | FOXA1  |   |       |          | 2.32 | 12 | 14.3            | GI.L.INT.FET                                                                                                                                                                                                                                                                                                                                                                                                                                                                                                                                                                                             |
|           |      | FOXD2  | S |       |          | 3.67 | 0  | 0.1 [0.0-0.2]   | GI.STMC.GAST, PANC, LNG.A549.ETOH002.CNCR, LIV.HEPG2.CNCR                                                                                                                                                                                                                                                                                                                                                                                                                                                                                                                                                |
|           |      | FOXL2  |   |       |          | 2.39 | 1  | 2.1 [0.0-71.0]  | ESDR.H1.MSC, LNG.IMR90, SKIN.PEN.FRSK.FIB.02, PLCNT.FET, GI.STMC.FET, OVRY, CRVX.HELAS3.CNCR                                                                                                                                                                                                                                                                                                                                                                                                                                                                                                             |
|           |      | FOXM1  |   |       |          | 1.91 | 1  | 9.1             | LIV.HEPG2.CNCR                                                                                                                                                                                                                                                                                                                                                                                                                                                                                                                                                                                           |
|           |      | FOXN3  |   |       |          | 1.77 | 50 | 19.6 [3.0-36.3] | LNG.A549.ETOH002.CNCR, LIV.HEPG2.CNCR                                                                                                                                                                                                                                                                                                                                                                                                                                                                                                                                                                    |
|           |      | FOXO3  |   |       |          | 2.05 | 54 | 14.0 [4.9-42.0] | ESDR.H1.BMP4.TROP, ESDR.H1.MSC, LNG.IMR90, SKIN.PEN.FRSK.FIB.01, SKIN.PEN.FRSK.FIB.02, SKIN.PEN.FRSK.MEL.01, ADRL.GLND.FET, MUS.LEG.FET, PLCNT.FET, GI.STMC.FET, GI.STMC.GAST, OVRY, PANC, LNG.A549.ETOH002.CNCR, CRVX.HELAS3.CNCR, LIV.HEPG2.CNCR                                                                                                                                                                                                                                                                                                                                                       |
| Cluster 6 | ARID | ARID3A |   |       | Poly-ala | 2.62 | 27 | 7.6 [1.4-284.7] | ESC.H1, ESDR.H1.BMP4.MESO, ESDR.H1.BMP4.TROP, ESDR.H1.MSC, ESDR.H1.NEUR.PROG, ESC.H9, LNG.IMR90, IPSC.DF.6.9, IPSC.DF.19.11, BLD.CD19.PPC, BLD.CD3.PPC, BLD.CD56.PC, BLD.MOB.CD34.PC.F, SKIN.PEN.FRSK.FIB.01, SKIN.PEN.FRSK.FIB.02, SKIN.PEN.FRSK.MEL.01, ADRL.GLND.FET, GI.L.INT.FET, GI.S.INT.FET, MUS.LEG.FET, PLCNT.FET, GI.STMC.FET, THYM.FET, GI.STMC.GAST, OVRY, PANC, MUS.PSOAS, GI.S.INT, LNG.A549.ETOH002.CNCR, BLD.GM12878, CRVX.HELAS3.CNCR, LIV.HEPG2.CNCR, BRST.HMEC, MUS.HSMM, MUS.HSMMT, BLD.K562.CNCR, BLD.CD14.MONO, BRN.NHA, SKIN.NHDFAD, SKIN.NHEK, LNG.NHLF, CLN.HCT116, BLD.Jurkat |
|           | BPTF | BPTF   |   |       |          | 1.85 | 57 | 14.7 [6.7-24.7] | ESDR.H1.BMP4.TROP, ESDR.H1.MSC, BLD.CD19.PPC, BLD.CD3.PPC, SKIN.PEN.FRSK.MEL.01, ADRL.GLND.FET, PLCNT.FET, OVRY, LNG.A549.ETOH002.CNCR, CRVX.HELAS3.CNCR, BRST.HMEC, CLN.HCT116                                                                                                                                                                                                                                                                                                                                                                                                                          |
|           | FOX  | FOXA2  |   | SATB2 |          | 2.07 | 12 | 0.0 [0.0-0.0]   | ESDR.H1.MSC, LNG.IMR90, SKIN.PEN.FRSK.FIB.01, CRVX.HELAS3.CNCR                                                                                                                                                                                                                                                                                                                                                                                                                                                                                                                                           |

|  |       |  |       |          |      |    |                 |                                                                                                                                                                                                                                                                                                                                                                                                                                                                                                                                                                                                                                                             |
|--|-------|--|-------|----------|------|----|-----------------|-------------------------------------------------------------------------------------------------------------------------------------------------------------------------------------------------------------------------------------------------------------------------------------------------------------------------------------------------------------------------------------------------------------------------------------------------------------------------------------------------------------------------------------------------------------------------------------------------------------------------------------------------------------|
|  |       |  |       |          |      |    |                 | ESC.H1, ESDR.H1.BMP4.MESO, ESDR.H1.BMP4.TROP, ESDR.H1.MSC, ESDR.H1.NEUR.PROG, ESC.H9, LNG.IMR90, IPSC.DF.6.9, IPSC.DF.19.11, BLD.CD14.PC, BLD.CD19.PPC, BLD.CD3.PPC, BLD.CD56.PC, BLD.MOB.CD34.PC.F, SKIN.PEN.FRISK.FIB.01, SKIN.PEN.FRISK.FIB.02, SKIN.PEN.FRISK.MEL.01, ADRL.GLND.FET, GI.L.INT.FET, GI.S.INT.FET, MUS.TRNK.FET, MUS.LEG.FET, PLCNT.FET, GI.STMC.FET, THYM.FET, OVRY, PANC, MUS.PSOAS, GI.S.INT, LNG.A549.ETOH002.CNCR, BLD.GM12878, CRVX.HELAS3.CNCR, LIV.HEPG2.CNCR, BRST.HMEC, MUS.HSMM, MUS.HSMMT, VAS.HUVEC, BLD.K562.CNCR, BLD.CD14.MONO, BRN.NHA, SKIN.NHDFAD, SKIN.NHEK, LNG.NHLF, CLN.HCT116, BLD.Jurkat, BLD.U937               |
|  | FOXC1 |  | SATB2 | Poly-ala | 3.00 | 14 | 1.3 [0.0-31.1]  |                                                                                                                                                                                                                                                                                                                                                                                                                                                                                                                                                                                                                                                             |
|  | FOXJ3 |  |       |          | 2.98 | 57 | 16.6 [9.1-27.0] | ESC.H1, ESDR.H1.BMP4.MESO, ESDR.H1.BMP4.TROP, ESDR.H1.MSC, ESDR.H1.NEUR.PROG, ESC.H9, LNG.IMR90, IPSC.DF.6.9, IPSC.DF.19.11, BLD.CD14.PC, BLD.CD19.PPC, BLD.CD3.PPC, BLD.CD56.PC, BLD.MOB.CD34.PC.F, SKIN.PEN.FRISK.FIB.01, SKIN.PEN.FRISK.FIB.02, SKIN.PEN.FRISK.MEL.01, ADRL.GLND.FET, GI.L.INT.FET, GI.S.INT.FET, MUS.TRNK.FET, MUS.LEG.FET, PLCNT.FET, GI.STMC.FET, THYM.FET, GI.STMC.GAST, OVRY, PANC, MUS.PSOAS, GI.S.INT, LNG.A549.ETOH002.CNCR, BLD.GM12878, CRVX.HELAS3.CNCR, LIV.HEPG2.CNCR, BRST.HMEC, MUS.HSMM, MUS.HSMMT, VAS.HUVEC, BLD.K562.CNCR, BLD.CD14.MONO, BRN.NHA, SKIN.NHDFAD, SKIN.NHEK, LNG.NHLF, CLN.HCT116, BLD.Jurkat, BLD.U937 |
|  | FOXO1 |  | SATB2 | Poly-ala | 2.17 | 42 | 7.2 [0.8-61.8]  | ESC.H1, ESDR.H1.BMP4.TROP, IPSC.DF.6.9, IPSC.DF.19.11, BLD.CD14.PC, BLD.CD19.PPC, BLD.CD3.PPC, BLD.CD56.PC, BLD.MOB.CD34.PC.F, SKIN.PEN.FRISK.FIB.01, ADRL.GLND.FET, GI.L.INT.FET, MUS.TRNK.FET, PLCNT.FET, THYM.FET, OVRY, MUS.PSOAS, GI.S.INT, BLD.GM12878, BRST.HMEC, MUS.HSMM, MUS.HSMMT, BLD.K562.CNCR, BLD.CD14.MONO, BRN.NHA, SKIN.NHDFAD, SKIN.NHEK, LNG.NHLF, CLN.HCT116, BLD.Jurkat, BLD.U937                                                                                                                                                                                                                                                     |

|      |       |  |       |      |    |                  |  |  |                                                                                                                                                                                                                                                                                                                                                                                                                                                                                                                                                                                                                                                                   |
|------|-------|--|-------|------|----|------------------|--|--|-------------------------------------------------------------------------------------------------------------------------------------------------------------------------------------------------------------------------------------------------------------------------------------------------------------------------------------------------------------------------------------------------------------------------------------------------------------------------------------------------------------------------------------------------------------------------------------------------------------------------------------------------------------------|
|      |       |  |       |      |    |                  |  |  | ESC.H1, ESDR.H1.BMP4.MESO, ESDR.H1.BMP4.TROP, ESDR.H1.MSC, ESDR.H1.NEUR.PROG, ESC.H9, LNG.IMR90, IPSC.DF.6.9, IPSC.DF.19.11, BLD.CD14.PC, BLD.CD19.PPC, BLD.CD3.PPC, BLD.CD56.PC, BLD.MOB.CD34.PC.F, SKIN.PEN.FRISK.FIB.01, SKIN.PEN.FRISK.FIB.02, SKIN.PEN.FRISK.MEL.01, ADRL.GLND.FET, GI.L.INT.FET, GI.S.INT.FET, MUS.TRNK.FET, MUS.LEG.FET, PLCNT.FET, GI.STMC.FET, THYM.FET, GI.STMC.GAST, OVRY, PANC, MUS.PSOAS, GI.S.INT, LNG.A549.ETOH002.CNCR, BLD.GM12878, CRVX.HELAS3.CNCR, LIV.HEPG2.CNCR, BRST.HMEC, MUS.HSMM, MUS.HSMMT, VAS.HUVEC, BLD.K562.CNCR, BLD.CD14.MONO, BRN.NHA, SKIN.NHDFAD, SKIN.NHEK, LNG.NHLF, CLN.HCT116, BLD.Jurkat, BLD.U937, UBIQ |
|      | FOXP1 |  | SATB2 | 6.01 | 35 | 6.7 [0.0-15.7]   |  |  |                                                                                                                                                                                                                                                                                                                                                                                                                                                                                                                                                                                                                                                                   |
| FUBP | FUBP1 |  |       | 2.11 | 57 | 33.8 [8.9-100.6] |  |  | ESC.H1, ESDR.H1.BMP4.MESO, ESDR.H1.BMP4.TROP, ESDR.H1.MSC, ESDR.H1.NEUR.PROG, ESC.H9, LNG.IMR90, IPSC.DF.6.9, IPSC.DF.19.11, BLD.CD14.PC, BLD.CD19.PPC, BLD.CD3.PPC, BLD.CD56.PC, BLD.MOB.CD34.PC.F, SKIN.PEN.FRISK.FIB.01, SKIN.PEN.FRISK.FIB.02, SKIN.PEN.FRISK.MEL.01, ADRL.GLND.FET, GI.L.INT.FET, GI.S.INT.FET, MUS.TRNK.FET, MUS.LEG.FET, PLCNT.FET, GI.STMC.FET, THYM.FET, GI.STMC.GAST, OVRY, PANC, MUS.PSOAS, GI.S.INT, LNG.A549.ETOH002.CNCR, BLD.GM12878, CRVX.HELAS3.CNCR, LIV.HEPG2.CNCR, BRST.HMEC, MUS.HSMM, MUS.HSMMT, VAS.HUVEC, BLD.K562.CNCR, BLD.CD14.MONO, BRN.NHA, SKIN.NHDFAD, SKIN.NHEK, LNG.NHLF, CLN.HCT116, BLD.Jurkat, BLD.U937       |
| IRF  | IRF1  |  |       | 2.60 | 22 | 3.3 [0.3-27.4]   |  |  | ESC.H1, ESDR.H1.BMP4.MESO, ESDR.H1.BMP4.TROP, ESDR.H1.MSC, ESDR.H1.NEUR.PROG, ESC.H9, LNG.IMR90, IPSC.DF.6.9, IPSC.DF.19.11, BLD.CD14.PC, BLD.CD19.PPC, BLD.CD3.PPC, BLD.CD56.PC, BLD.MOB.CD34.PC.F, SKIN.PEN.FRISK.FIB.01, SKIN.PEN.FRISK.FIB.02, SKIN.PEN.FRISK.MEL.01, ADRL.GLND.FET, GI.L.INT.FET, GI.S.INT.FET, MUS.TRNK.FET, MUS.LEG.FET, PLCNT.FET, GI.STMC.FET, THYM.FET, GI.STMC.GAST, OVRY, PANC, MUS.PSOAS, GI.S.INT, LNG.A549.ETOH002.CNCR, BLD.GM12878, CRVX.HELAS3.CNCR, LIV.HEPG2.CNCR, BRST.HMEC, MUS.HSMM, MUS.HSMMT, VAS.HUVEC, BLD.K562.CNCR, BLD.CD14.MONO, BRN.NHA, SKIN.NHDFAD, SKIN.NHEK, LNG.NHLF, CLN.HCT116, BLD.Jurkat, BLD.U937       |

|     |        |  |  |  |      |    |                |                                                                                                                                                                                                                                                                                                                                                                                                                                                                                                                                                                                                                                    |
|-----|--------|--|--|--|------|----|----------------|------------------------------------------------------------------------------------------------------------------------------------------------------------------------------------------------------------------------------------------------------------------------------------------------------------------------------------------------------------------------------------------------------------------------------------------------------------------------------------------------------------------------------------------------------------------------------------------------------------------------------------|
|     |        |  |  |  |      |    |                | ESC.H1, ESDR.H1.BMP4.MESO, ESDR.H1.BMP4.TROP, ESDR.H1.MSC, ESDR.H1.NEUR.PROG, LNG.IMR90, IPSC.DF.6.9, IPSC.DF.19.11, BLD.CD14.PC, BLD.CD19.PPC, BLD.CD3.PPC, BLD.CD56.PC, BLD.MOB.CD34.PC.F, SKIN.PEN.FRISK.FIB.01, SKIN.PEN.FRISK.FIB.02, SKIN.PEN.FRISK.MEL.01, ADRL.GLND.FET, GI.L.INT.FET, GI.S.INT.FET, MUS.TRNK.FET, MUS.LEG.FET, PLCNT.FET, GI.STMC.FET, THYM.FET, GI.STMC.GAST, OVRY, MUS.PSOAS, GI.S.INT, LNG.A549.ETOH002.CNCR, BLD.GM12878, CRVX.HELAS3.CNCR, LIV.HEPG2.CNCR, BRST.HMEC, MUS.HSMM, VAS.HUVEC, BLD.K562.CNCR, BLD.CD14.MONO, BRN.NHA, SKIN.NHDFAD, SKIN.NHEK, LNG.NHLF, CLN.HCT116, BLD.Jurkat, BLD.U937 |
|     | IRF5   |  |  |  | 2.08 | 10 | 0.4 [0.0-26.7] |                                                                                                                                                                                                                                                                                                                                                                                                                                                                                                                                                                                                                                    |
| MEF | MEF2C  |  |  |  | 2.01 | 21 | 61.1           | MUS.HSMM                                                                                                                                                                                                                                                                                                                                                                                                                                                                                                                                                                                                                           |
| SRY | SRY    |  |  |  | 2.21 | 1  | 0.5 [0.0-1.1]  | ESDR.H1.BMP4.MESO, ESC.H9, IPSC.DF.6.9, SKIN.PEN.FRISK.MEL.01                                                                                                                                                                                                                                                                                                                                                                                                                                                                                                                                                                      |
| ZNF | ZNF148 |  |  |  | 2.43 | 43 | 2.3            | SKIN.PEN.FRISK.MEL.01                                                                                                                                                                                                                                                                                                                                                                                                                                                                                                                                                                                                              |
|     | ZNF202 |  |  |  | 0.44 | 33 | 4.0 [3.7-12.9] | PLCNT.FET, GI.STMC.GAST, PANC, GI.S.INT, CLN.HCT116, UBIQ                                                                                                                                                                                                                                                                                                                                                                                                                                                                                                                                                                          |
|     | ZNF35  |  |  |  | 1.64 | 25 | 4.8 [1.4-8.7]  | ESDR.H1.MSC, SKIN.PEN.FRISK.MEL.01, ADRL.GLND.FET, PLCNT.FET, LNG.A549.ETOH002.CNCR, CRVX.HELAS3.CNCR                                                                                                                                                                                                                                                                                                                                                                                                                                                                                                                              |

**Table S2. Enrichment of functional properties in TF motif clusters**

|                                                            | <b>Term</b>                                                                                                    | <b>1</b> | <b>2</b> | <b>3</b> | <b>4</b> | <b>5</b> | <b>6</b> |
|------------------------------------------------------------|----------------------------------------------------------------------------------------------------------------|----------|----------|----------|----------|----------|----------|
| <b>BIOCARTA</b>                                            | h_tertPathway:Overview of telomerase protein component gene hTert Transcriptional Regulation                   | 0.0      | 0.0      | 2.4      | 0.0      | 0.0      | 0.0      |
| <b>BIOGRID_INTERACTION</b>                                 | 2033:EP300~E1A binding protein p300                                                                            | 0.0      | 3.1      | 5.6      | 0.8      | 7.2      | 0.0      |
|                                                            | 1387:CREBBP~CREB binding protein                                                                               | 0.0      | 0.0      | 0.1      | 0.0      | 7.1      | 0.0      |
|                                                            | 2353:FOS~Fos proto-oncogene, AP-1 transcription factor subunit                                                 | 0.0      | 0.0      | 0.0      | 0.0      | 4.8      | 0.0      |
|                                                            | 3239:HOXD13~homeobox D13                                                                                       | 0.0      | 3.3      | 0.0      | 0.0      | 0.0      | 0.0      |
|                                                            | 23314:SATB2~SATB homeobox 2                                                                                    | 0.0      | 2.9      | 0.0      | 0.0      | 0.0      | 0.0      |
|                                                            | 6667:SP1~Sp1 transcription factor                                                                              | 1.8      | 0.0      | 2.8      | 0.0      | 0.0      | 0.0      |
|                                                            | 468:ATF4~activating transcription factor 4                                                                     | 0.0      | 0.0      | 0.0      | 0.0      | 1.8      | 0.0      |
|                                                            | 1386:ATF2~activating transcription factor 2                                                                    | 0.0      | 0.0      | 0.0      | 0.0      | 1.7      | 0.0      |
|                                                            | 6929:TCF3~transcription factor 3                                                                               | 0.0      | 0.0      | 0.0      | 0.0      | 1.7      | 0.0      |
|                                                            | 3725:JUN~Jun proto-oncogene, AP-1 transcription factor subunit                                                 | 0.0      | 0.0      | 1.3      | 0.0      | 1.7      | 0.0      |
|                                                            | 57154:SMURF1~SMAD specific E3 ubiquitin protein ligase 1                                                       | 0.0      | 0.0      | 0.0      | 0.0      | 1.6      | 0.0      |
|                                                            | 4088:SMAD3~SMAD family member 3                                                                                | 0.0      | 0.0      | 0.0      | 0.0      | 1.6      | 0.2      |
|                                                            | 10413:YAP1~Yes associated protein 1                                                                            | 0.0      | 0.0      | 0.0      | 0.0      | 1.5      | 0.0      |
|                                                            | 10014:HDAC5~histone deacetylase 5                                                                              | 0.0      | 0.0      | 0.0      | 0.0      | 1.5      | 0.0      |
|                                                            | 1786:DNMT1~DNA methyltransferase 1                                                                             | 0.0      | 0.0      | 1.5      | 0.0      | 0.0      | 0.0      |
|                                                            | 7392:USF2~upstream transcription factor 2, c-fos interacting                                                   | 0.0      | 0.0      | 0.0      | 0.0      | 1.5      | 0.0      |
|                                                            | 11016:ATF7~activating transcription factor 7                                                                   | 0.0      | 0.0      | 0.0      | 0.0      | 1.5      | 0.0      |
|                                                            | 6605:SMARCE1~SWI/SNF related, matrix associated, actin dependent regulator of chromatin, subfamily e, member 1 | 0.0      | 0.0      | 0.0      | 0.0      | 1.5      | 0.0      |
|                                                            | 26145:IRF2BP1~interferon regulatory factor 2 binding protein 1                                                 | 0.0      | 0.0      | 0.0      | 0.0      | 1.4      | 0.0      |
|                                                            | 10538:BATF~basic leucine zipper ATF-like transcription factor                                                  | 0.0      | 0.0      | 0.0      | 0.0      | 1.4      | 0.0      |
| 25937:WWTR1~WW domain containing transcription regulator 1 | 0.0                                                                                                            | 0.0      | 0.0      | 0.0      | 1.4      | 0.0      |          |
| 6304:SATB1~SATB homeobox 1                                 | 0.0                                                                                                            | 1.3      | 0.0      | 0.0      | 0.0      | 0.0      |          |
| <b>COG</b>                                                 | Transcription / Cell division and chromosome partitioning                                                      | 0.0      | 0.0      | 3.2      | 0.0      | 0.0      | 0.0      |
|                                                            | Transcription                                                                                                  | 0.0      | 2.5      | 0.0      | 0.0      | 0.0      | 0.0      |
| <b>GOTERM_BP</b>                                           | GO:0006357~regulation of transcription from RNA polymerase II promoter                                         | 0.1      | 1.8      | 0.0      | 5.5      | 19.7     | 0.1      |
|                                                            | GO:0045944~positive regulation of transcription from RNA polymerase II promoter                                | 5.1      | 4.1      | 2.4      | 14.9     | 16.4     | 1.4      |
|                                                            | GO:0006366~transcription from RNA polymerase II promoter                                                       | 3.8      | 3.6      | 4.7      | 10.7     | 15.6     | 1.6      |

|           |                                                                                                                          |     |     |     |      |      |     |
|-----------|--------------------------------------------------------------------------------------------------------------------------|-----|-----|-----|------|------|-----|
|           | GO:0045893~positive regulation of transcription, DNA-templated                                                           | 2.5 | 3.8 | 2.6 | 5.1  | 9.8  | 1.9 |
|           | GO:0000122~negative regulation of transcription from RNA polymerase II promoter                                          | 1.0 | 2.0 | 2.9 | 4.1  | 6.8  | 1.7 |
|           | GO:0030154~cell differentiation                                                                                          | 0.0 | 0.0 | 0.0 | 4.2  | 0.0  | 0.1 |
|           | GO:0006355~regulation of transcription, DNA-templated                                                                    | 0.0 | 0.3 | 4.0 | 0.0  | 0.4  | 0.0 |
|           | GO:0006351~transcription, DNA-templated                                                                                  | 1.3 | 3.5 | 1.7 | 2.7  | 3.0  | 0.1 |
|           | GO:0045892~negative regulation of transcription, DNA-templated                                                           | 0.6 | 0.6 | 1.7 | 3.0  | 0.1  | 0.8 |
|           | GO:0035019~somatic stem cell population maintenance                                                                      | 0.0 | 0.0 | 0.0 | 2.6  | 0.0  | 0.0 |
|           | GO:0001824~blastocyst development                                                                                        | 0.0 | 0.0 | 0.0 | 2.2  | 0.4  | 0.0 |
|           | GO:0009887~organ morphogenesis                                                                                           | 0.0 | 0.0 | 0.0 | 2.2  | 0.0  | 0.0 |
|           | GO:1901653~cellular response to peptide                                                                                  | 0.0 | 0.0 | 0.0 | 0.0  | 2.1  | 0.0 |
|           | GO:0060337~type I interferon signaling pathway                                                                           | 0.0 | 0.2 | 0.3 | 0.0  | 2.1  | 0.0 |
|           | GO:0042832~defense response to protozoan                                                                                 | 0.0 | 0.0 | 0.0 | 0.0  | 1.7  | 0.0 |
|           | GO:0030218~erythrocyte differentiation                                                                                   | 0.0 | 0.0 | 0.0 | 1.5  | 0.0  | 0.0 |
|           | GO:0035329~hippo signaling                                                                                               | 0.0 | 0.0 | 0.0 | 0.0  | 1.5  | 0.0 |
|           | GO:0045595~regulation of cell differentiation                                                                            | 0.0 | 0.0 | 0.0 | 0.0  | 1.4  | 0.0 |
| GOTERM_CC | GO:0005634~nucleus                                                                                                       | 3.6 | 4.8 | 6.6 | 8.2  | 6.1  | 1.7 |
|           | GO:0005654~nucleoplasm                                                                                                   | 1.4 | 5.3 | 4.0 | 2.7  | 6.7  | 0.0 |
|           | GO:0005667~transcription factor complex                                                                                  | 0.0 | 0.0 | 1.1 | 6.4  | 3.9  | 0.0 |
|           | GO:0000790~nuclear chromatin                                                                                             | 0.0 | 0.0 | 0.4 | 2.3  | 5.1  | 0.0 |
|           | GO:0090575~RNA polymerase II transcription factor complex                                                                | 0.0 | 0.0 | 0.0 | 0.0  | 2.1  | 0.0 |
|           | GO:0016607~nuclear speck                                                                                                 | 0.0 | 0.3 | 1.3 | 0.0  | 0.0  | 0.0 |
| GOTERM_MF | GO:0003700~transcription factor activity, sequence-specific DNA binding                                                  | 4.3 | 7.9 | 9.0 | 11.1 | 23.8 | 5.2 |
|           | GO:0000978~RNA polymerase II core promoter proximal region sequence-specific DNA binding                                 | 3.7 | 2.8 | 2.7 | 4.4  | 17.2 | 0.0 |
|           | GO:0001077~transcriptional activator activity, RNA polymerase II core promoter proximal region sequence-specific binding | 4.3 | 0.4 | 4.6 | 5.3  | 16.5 | 0.6 |
|           | GO:0043565~sequence-specific DNA binding                                                                                 | 5.6 | 7.4 | 4.5 | 14.5 | 7.9  | 6.3 |
|           | GO:0000981~RNA polymerase II transcription factor activity, sequence-specific DNA binding                                | 0.0 | 7.4 | 1.5 | 9.5  | 1.9  | 4.2 |
|           | GO:0000982~transcription factor activity, RNA polymerase II core promoter proximal region sequence-specific binding      | 0.0 | 0.0 | 0.0 | 0.0  | 8.1  | 0.0 |
|           | GO:0003677~DNA binding                                                                                                   | 2.3 | 2.8 | 2.7 | 2.5  | 5.4  | 1.4 |
|           | GO:0070888~E-box binding                                                                                                 | 0.0 | 0.0 | 0.0 | 2.4  | 5.4  | 0.0 |
|           | GO:0044212~transcription regulatory region DNA binding                                                                   | 4.4 | 1.3 | 2.3 | 2.1  | 4.8  | 0.0 |
|           | GO:0035035~histone acetyltransferase binding                                                                             | 0.0 | 0.0 | 4.6 | 0.0  | 0.0  | 0.0 |
|           | GO:0046872~metal ion binding                                                                                             | 0.0 | 0.3 | 4.5 | 0.0  | 0.1  | 0.0 |
|           | GO:0043425~bHLH transcription factor binding                                                                             | 0.0 | 0.0 | 0.0 | 0.0  | 4.2  | 0.0 |
|           | GO:0008134~transcription factor binding                                                                                  | 1.4 | 2.0 | 1.1 | 1.8  | 4.2  | 0.0 |

|        |                                                                                                                            |     |     |     |     |     |     |
|--------|----------------------------------------------------------------------------------------------------------------------------|-----|-----|-----|-----|-----|-----|
|        | GO:0001078~transcriptional repressor activity, RNA polymerase II core promoter proximal region sequence-specific binding   | 0.8 | 0.6 | 1.8 | 4.0 | 1.3 | 0.0 |
|        | GO:0001085~RNA polymerase II transcription factor binding                                                                  | 0.0 | 0.0 | 0.0 | 3.7 | 0.7 | 0.0 |
|        | GO:0005515~protein binding                                                                                                 | 0.3 | 0.5 | 1.7 | 0.4 | 3.6 | 0.0 |
|        | GO:0046982~protein heterodimerization activity                                                                             | 0.4 | 0.0 | 0.2 | 0.0 | 3.1 | 0.0 |
|        | GO:0000975~regulatory region DNA binding                                                                                   | 0.0 | 1.3 | 0.0 | 0.0 | 3.0 | 0.0 |
|        | GO:0001228~transcriptional activator activity, RNA polymerase II transcription regulatory region sequence-specific binding | 0.8 | 0.6 | 0.0 | 2.8 | 0.5 | 0.0 |
|        | GO:0001158~enhancer sequence-specific DNA binding                                                                          | 0.0 | 0.0 | 0.0 | 2.8 | 0.0 | 0.0 |
|        | GO:0000979~RNA polymerase II core promoter sequence-specific DNA binding                                                   | 2.6 | 0.0 | 2.2 | 2.1 | 1.8 | 0.0 |
|        | GO:0003705~transcription factor activity, RNA polymerase II distal enhancer sequence-specific binding                      | 2.5 | 2.0 | 0.8 | 0.0 | 1.7 | 0.0 |
|        | GO:0046983~protein dimerization activity                                                                                   | 0.0 | 0.0 | 0.0 | 2.4 | 2.0 | 0.0 |
|        | GO:0003713~transcription coactivator activity                                                                              | 1.5 | 0.0 | 0.0 | 1.0 | 2.4 | 0.0 |
|        | GO:0000977~RNA polymerase II regulatory region sequence-specific DNA binding                                               | 0.0 | 1.3 | 2.3 | 2.0 | 0.9 | 0.0 |
|        | GO:0003676~nucleic acid binding                                                                                            | 0.2 | 0.1 | 2.2 | 0.0 | 0.1 | 0.0 |
|        | GO:0000976~transcription regulatory region sequence-specific DNA binding                                                   | 0.0 | 0.0 | 0.0 | 2.1 | 0.0 | 0.0 |
|        | GO:0000980~RNA polymerase II distal enhancer sequence-specific DNA binding                                                 | 0.0 | 0.0 | 0.0 | 2.0 | 0.0 | 0.0 |
|        | GO:0044729~hemi-methylated DNA-binding                                                                                     | 0.0 | 0.0 | 1.9 | 0.0 | 0.0 | 0.0 |
|        | GO:0010385~double-stranded methylated DNA binding                                                                          | 0.0 | 0.0 | 1.8 | 0.0 | 0.0 | 0.0 |
|        | GO:0003682~chromatin binding                                                                                               | 0.4 | 1.7 | 0.3 | 1.5 | 1.8 | 0.0 |
|        | GO:0042826~histone deacetylase binding                                                                                     | 0.0 | 0.0 | 0.7 | 0.0 | 1.4 | 0.0 |
| INTACT | 11016:activating transcription factor 7(ATF7)                                                                              | 0.0 | 0.0 | 0.0 | 0.0 | 4.0 | 0.0 |
|        | 3726:JunB proto-oncogene, AP-1 transcription factor subunit(JUNB)                                                          | 0.0 | 0.0 | 0.0 | 0.0 | 3.9 | 0.0 |
|        | 1649:DNA damage inducible transcript 3(DDIT3)                                                                              | 0.0 | 0.0 | 0.0 | 0.0 | 3.8 | 0.0 |
|        | 468:activating transcription factor 4(ATF4)                                                                                | 0.0 | 0.0 | 0.0 | 0.0 | 3.4 | 0.0 |
|        | 23314:SATB homeobox 2(SATB2)                                                                                               | 0.0 | 3.3 | 0.0 | 0.0 | 0.0 | 0.0 |
|        | 3727:JunD proto-oncogene, AP-1 transcription factor subunit(JUND)                                                          | 0.0 | 0.0 | 0.3 | 0.0 | 3.0 | 0.0 |
|        | 9935:MAF bZIP transcription factor B(MAFB)                                                                                 | 0.0 | 0.0 | 0.0 | 0.0 | 1.8 | 0.0 |
|        | 3229:homeobox C13(HOXC13)                                                                                                  | 0.0 | 1.7 | 0.0 | 0.0 | 0.0 | 0.0 |
|        | 4779:nuclear factor, erythroid 2 like 1(NFE2L1)                                                                            | 0.0 | 0.0 | 0.0 | 0.0 | 1.6 | 0.0 |
|        | 6304:SATB homeobox 1(SATB1)                                                                                                | 0.0 | 1.6 | 0.0 | 0.0 | 0.0 | 0.0 |
|        | 6886:TAL bHLH transcription factor 1, erythroid differentiation factor(TAL1)                                               | 0.0 | 0.0 | 0.0 | 1.6 | 0.2 | 0.0 |
|        | 1386:activating transcription factor 2(ATF2)                                                                               | 0.0 | 0.0 | 0.0 | 0.0 | 1.5 | 0.0 |
|        |                                                                                                                            |     |     |     |     |     |     |

|          |                                                                              |     |     |     |      |     |      |
|----------|------------------------------------------------------------------------------|-----|-----|-----|------|-----|------|
| INTERPRO | IPR000418:Ets domain                                                         | 0.0 | 0.0 | 0.0 | 16.2 | 0.0 | 0.0  |
|          | IPR001766:Transcription factor, fork head                                    | 0.0 | 6.1 | 0.0 | 0.0  | 0.0 | 12.3 |
|          | IPR018122:Transcription factor, fork head, conserved site                    | 0.0 | 2.5 | 0.0 | 0.0  | 0.0 | 9.9  |
|          | IPR004827:Basic-leucine zipper domain                                        | 0.0 | 0.0 | 0.0 | 0.0  | 9.8 | 0.0  |
|          | IPR011991:Winged helix-turn-helix DNA-binding domain                         | 0.0 | 6.4 | 0.1 | 8.7  | 2.4 | 9.3  |
|          | IPR015880:Zinc finger, C2H2-like                                             | 0.7 | 0.3 | 9.2 | 0.1  | 0.9 | 0.0  |
|          | IPR013087:Zinc finger C2H2-type/integrase DNA-binding domain                 | 0.7 | 0.3 | 9.2 | 0.1  | 1.0 | 0.0  |
|          | IPR007087:Zinc finger, C2H2                                                  | 0.8 | 0.3 | 9.2 | 0.1  | 0.9 | 0.0  |
|          | IPR000837:Fos transforming protein                                           | 0.0 | 0.0 | 0.0 | 0.0  | 7.6 | 0.0  |
|          | IPR011598:Myc-type, basic helix-loop-helix (bHLH) domain                     | 0.0 | 0.0 | 0.0 | 1.5  | 6.2 | 0.0  |
|          | IPR003118:Pointed domain                                                     | 0.0 | 0.0 | 0.0 | 5.6  | 0.0 | 0.0  |
|          | IPR013761:Sterile alpha motif/pointed domain                                 | 0.0 | 0.0 | 0.0 | 4.1  | 0.0 | 0.0  |
|          | IPR016361:Transcriptional enhancer factor                                    | 0.0 | 0.0 | 0.0 | 0.0  | 3.6 | 0.0  |
|          | IPR000818:TEA/ATTS                                                           | 0.0 | 0.0 | 0.0 | 0.0  | 3.6 | 0.0  |
|          | IPR019471:Interferon regulatory factor-3                                     | 0.0 | 0.0 | 0.0 | 0.0  | 3.2 | 0.0  |
|          | IPR001346:Interferon regulatory factor DNA-binding domain                    | 0.0 | 1.3 | 0.0 | 0.0  | 3.0 | 0.0  |
|          | IPR019817:Interferon regulatory factor, conserved site                       | 0.0 | 1.3 | 0.0 | 0.0  | 3.0 | 0.0  |
|          | IPR001356:Homeodomain                                                        | 0.0 | 0.0 | 0.0 | 2.9  | 0.0 | 0.0  |
|          | IPR008917:Eukaryotic transcription factor, Skn-1-like, DNA-binding           | 0.0 | 0.0 | 0.0 | 0.0  | 2.6 | 0.0  |
|          | IPR017855:SMAD domain-like                                                   | 0.0 | 0.0 | 0.0 | 0.0  | 2.6 | 0.0  |
|          | IPR009057:Homeodomain-like                                                   | 0.0 | 0.0 | 0.0 | 2.5  | 0.1 | 0.0  |
|          | IPR017970:Homeobox, conserved site                                           | 0.0 | 0.0 | 0.0 | 2.2  | 0.0 | 0.0  |
|          | IPR013088:Zinc finger, NHR/GATA-type                                         | 0.8 | 0.0 | 0.0 | 2.0  | 0.0 | 0.0  |
|          | IPR008967:p53-like transcription factor, DNA-binding                         | 0.0 | 0.0 | 0.0 | 0.0  | 1.8 | 0.0  |
|          | IPR022084:Transcription factor Elf, N-terminal                               | 0.0 | 0.0 | 0.0 | 1.8  | 0.0 | 0.0  |
|          | IPR008984:SMAD/FHA domain                                                    | 0.0 | 0.0 | 0.0 | 0.0  | 1.7 | 0.0  |
|          | IPR013711:Runx, C-terminal domain                                            | 0.0 | 0.0 | 0.0 | 0.0  | 1.6 | 0.0  |
|          | IPR013524:Runt domain                                                        | 0.0 | 0.0 | 0.0 | 0.0  | 1.6 | 0.0  |
|          | IPR000040:Acute myeloid leukemia 1 protein (AML1)/Runt                       | 0.0 | 0.0 | 0.0 | 0.0  | 1.6 | 0.0  |
|          | IPR027384:Runx, central domain                                               | 0.0 | 0.0 | 0.0 | 0.0  | 1.6 | 0.0  |
|          | IPR021802:Basic helix-loop-helix leucine zipper transcription factor MiT/TFE | 0.0 | 0.0 | 0.0 | 0.0  | 1.5 | 0.0  |
|          | IPR012346:p53/RUNT-type transcription factor, DNA-binding domain             | 0.0 | 0.0 | 0.0 | 0.0  | 1.4 | 0.0  |



|                 |                                                           |     |      |      |      |      |      |
|-----------------|-----------------------------------------------------------|-----|------|------|------|------|------|
| KEGG_PATHWAY    | hsa04380:Osteoclast differentiation                       | 0.0 | 0.0  | 0.0  | 0.0  | 4.6  | 0.0  |
|                 | PF00178:Ets-domain                                        | 0.0 | 0.0  | 0.0  | 16.3 | 0.0  | 0.0  |
| PFAM            | PF00250:Fork head domain                                  | 0.0 | 6.1  | 0.0  | 0.0  | 0.0  | 12.4 |
|                 | PF00170:bZIP transcription factor                         | 0.0 | 0.0  | 0.0  | 0.0  | 7.6  | 0.0  |
|                 | PF00010:Helix-loop-helix DNA-binding domain               | 0.0 | 0.0  | 0.0  | 1.6  | 6.4  | 0.0  |
|                 | PF02198:Sterile alpha motif (SAM)/Pointed domain          | 0.0 | 0.0  | 0.0  | 5.7  | 0.0  | 0.0  |
|                 | PF00096:Zinc finger, C2H2 type                            | 0.0 | 0.0  | 4.6  | 0.0  | 0.8  | 0.0  |
|                 | PF01285:TEA/ATTS domain family                            | 0.0 | 0.0  | 0.0  | 0.0  | 3.8  | 0.0  |
|                 | PF10401:Interferon-regulatory factor 3                    | 0.0 | 0.0  | 0.0  | 0.0  | 3.4  | 0.0  |
|                 | PF00605:Interferon regulatory factor transcription factor | 0.0 | 1.2  | 0.0  | 0.0  | 3.2  | 0.0  |
|                 | PF00046:Homeobox domain                                   | 0.0 | 0.0  | 0.0  | 3.1  | 0.0  | 0.0  |
|                 | PF12310:Transcription factor protein N terminal           | 0.0 | 0.0  | 0.0  | 1.8  | 0.0  | 0.0  |
|                 | PF00853:Runt domain                                       | 0.0 | 0.0  | 0.0  | 0.0  | 1.6  | 0.0  |
|                 | PF08504:Runx inhibition domain                            | 0.0 | 0.0  | 0.0  | 0.0  | 1.6  | 0.0  |
|                 | PF11851:Domain of unknown function (DUF3371)              | 0.0 | 0.0  | 0.0  | 0.0  | 1.6  | 0.0  |
|                 | PF00320:GATA zinc finger                                  | 0.0 | 0.0  | 0.0  | 1.4  | 0.0  | 0.0  |
|                 | PF00157:Pou domain - N-terminal to homeobox domain        | 0.0 | 0.0  | 0.0  | 1.3  | 0.0  | 0.0  |
| PIR_SUPERFAMILY | PIRSF002603:transcriptional enhancer factor               | 0.0 | 0.0  | 0.0  | 0.0  | 4.3  | 0.0  |
| SMART           | SM00413:ETS                                               | 0.0 | 0.0  | 0.0  | 14.7 | 0.0  | 0.0  |
|                 | SM00339:FH                                                | 0.0 | 5.2  | 0.0  | 0.0  | 0.0  | 11.7 |
|                 | SM00338:BRLZ                                              | 0.0 | 0.0  | 0.0  | 0.0  | 9.0  | 0.0  |
|                 | SM00355:ZnF_C2H2                                          | 0.9 | 0.1  | 6.8  | 0.0  | 0.5  | 0.0  |
|                 | SM00353:HLH                                               | 0.0 | 0.0  | 0.0  | 1.3  | 5.4  | 0.0  |
|                 | SM00251:SAM_PNT                                           | 0.0 | 0.0  | 0.0  | 5.2  | 0.0  | 0.0  |
|                 | SM00426:TEA                                               | 0.0 | 0.0  | 0.0  | 0.0  | 3.7  | 0.0  |
|                 | SM01243:SM01243                                           | 0.0 | 0.0  | 0.0  | 0.0  | 3.3  | 0.0  |
|                 | SM00348:IRF                                               | 0.0 | 1.1  | 0.0  | 0.0  | 3.1  | 0.0  |
|                 | SM00389:HOX                                               | 0.0 | 0.0  | 0.0  | 2.3  | 0.0  | 0.0  |
|                 | SM00401:ZnF_GATA                                          | 0.0 | 0.0  | 0.0  | 1.3  | 0.0  | 0.0  |
| UP_KEYW_ORDS    | DNA-binding                                               | 7.5 | 10.8 | 13.4 | 15.7 | 27.0 | 3.6  |
|                 | Transcription regulation                                  | 7.3 | 11.7 | 12.9 | 16.1 | 21.7 | 3.6  |
|                 | Transcription                                             | 7.3 | 11.8 | 12.9 | 16.1 | 21.5 | 3.7  |
|                 | Nucleus                                                   | 4.5 | 7.3  | 7.9  | 11.5 | 17.3 | 2.2  |

|                |                                                                                   |     |     |      |      |      |      |
|----------------|-----------------------------------------------------------------------------------|-----|-----|------|------|------|------|
|                | Activator                                                                         | 4.5 | 2.4 | 7.3  | 8.6  | 16.3 | 1.3  |
|                | Zinc-finger                                                                       | 1.5 | 1.0 | 6.5  | 0.6  | 0.2  | 0.0  |
|                | Ubl conjugation                                                                   | 1.0 | 3.4 | 3.5  | 1.7  | 6.4  | 0.7  |
|                | Zinc                                                                              | 1.2 | 0.7 | 5.4  | 0.7  | 0.1  | 0.0  |
|                | Repressor                                                                         | 1.0 | 2.4 | 4.9  | 1.9  | 0.7  | 0.4  |
|                | Isopeptide bond                                                                   | 1.3 | 2.5 | 3.4  | 2.4  | 4.6  | 0.3  |
|                | Metal-binding                                                                     | 0.8 | 0.4 | 3.8  | 0.3  | 0.0  | 0.0  |
|                | Developmental protein                                                             | 0.0 | 0.2 | 0.5  | 3.7  | 0.1  | 0.0  |
|                | Phosphoprotein                                                                    | 0.6 | 2.5 | 1.0  | 0.4  | 3.1  | 1.4  |
|                | Homeobox                                                                          | 0.0 | 0.0 | 0.0  | 3.1  | 0.0  | 0.0  |
|                | Differentiation                                                                   | 0.0 | 0.7 | 1.4  | 1.8  | 0.6  | 0.0  |
| Coiled coil    | 0.0                                                                               | 0.0 | 0.0 | 0.0  | 1.7  | 0.0  |      |
| UP_SEQ_FEATURE | DNA-binding region:Basic motif                                                    | 0.0 | 0.0 | 0.0  | 0.2  | 19.5 | 0.0  |
|                | DNA-binding region:ETS                                                            | 0.0 | 0.0 | 0.0  | 16.3 | 0.0  | 0.0  |
|                | domain:Leucine-zipper                                                             | 0.0 | 0.0 | 0.0  | 0.0  | 15.6 | 0.0  |
|                | DNA-binding region:Fork-head                                                      | 0.0 | 5.5 | 0.0  | 0.0  | 0.0  | 11.9 |
|                | zinc finger region:C2H2-type 1                                                    | 0.7 | 0.2 | 10.3 | 0.1  | 1.1  | 0.0  |
|                | zinc finger region:C2H2-type 3                                                    | 0.8 | 0.3 | 10.1 | 0.0  | 1.0  | 0.0  |
|                | zinc finger region:C2H2-type 2                                                    | 0.7 | 0.2 | 10.1 | 0.0  | 1.0  | 0.0  |
|                | domain:Helix-loop-helix motif                                                     | 0.0 | 0.0 | 0.0  | 1.2  | 6.3  | 0.0  |
|                | domain:PNT                                                                        | 0.0 | 0.0 | 0.0  | 5.3  | 0.0  | 0.0  |
|                | cross-link:Glycyl lysine isopeptide (Lys-Gly)<br>(interchain with G-Cter in SUMO) | 1.6 | 0.3 | 1.3  | 4.1  | 0.2  | 0.0  |
|                | DNA-binding region:TEA                                                            | 0.0 | 0.0 | 0.0  | 0.0  | 3.6  | 0.0  |
|                | DNA-binding region:Tryptophan pentad repeat                                       | 0.0 | 0.8 | 0.0  | 0.0  | 2.9  | 0.0  |
|                | DNA-binding region:Homeobox                                                       | 0.0 | 0.0 | 0.0  | 1.8  | 0.0  | 0.0  |

**Table S3. Co-enrichment and -depletion of motifs from different clusters**

| Cluster Pair | Odds Ratio (Genomic) | Odds Ratio (Shuffled) | p-value (Genomic) | p-value (Shuffled) |
|--------------|----------------------|-----------------------|-------------------|--------------------|
| 1_2          | 0.36 [0.36-0.37]     | 0.54 [0.53-0.55]      | 0.0E+00           | 0.0E+00            |
| 1_3          | 0.76 [0.75-0.77]     | 0.77 [0.75-0.78]      | 0.0E+00           | 9.2E-193           |
| 1_4          | 1.29 [1.26-1.32]     | 1.74 [1.70-1.77]      | 4.9E-98           | 0.0E+00            |
| 1_5          | 1.51 [1.49-1.54]     | 1.43 [1.40-1.46]      | 0.0E+00           | 1.0E-217           |
| 1_6          | 0.81 [0.79-0.83]     | 0.69 [0.68-0.71]      | 1.0E-61           | 0.0E+00            |
| 2_3          | 1.04 [1.03-1.06]     | 1.08 [1.06-1.09]      | 8.9E-08           | 5.3E-26            |
| 2_4          | 0.92 [0.90-0.94]     | 1.06 [1.05-1.08]      | 4.5E-12           | 9.0E-16            |
| 2_5          | 0.56 [0.55-0.57]     | 0.71 [0.70-0.72]      | 0.0E+00           | 2.9E-261           |
| 2_6          | 1.33 [1.30-1.36]     | 1.08 [1.06-1.10]      | 2.6E-114          | 3.0E-26            |
| 3_4          | 1.28 [1.26-1.31]     | 1.16 [1.14-1.18]      | 1.9E-112          | 7.3E-75            |
| 3_5          | 0.64 [0.64-0.65]     | 0.83 [0.81-0.84]      | 0.0E+00           | 8.8E-73            |
| 3_6          | 1.02 [1.00-1.05]     | 1.12 [1.10-1.13]      | 4.3E-02           | 2.0E-45            |
| 4_5          | 0.93 [0.91-0.95]     | 0.81 [0.79-0.83]      | 2.4E-09           | 1.2E-86            |
| 4_6          | 0.44 [0.41-0.46]     | 0.47 [0.46-0.48]      | 1.9E-275          | 0.0E+00            |
| 5_6          | 1.84 [1.79-1.89]     | 1.72 [1.68-1.75]      | 0.0E+00           | 0.0E+00            |
